# Supplementary material
Source: PubMed Central journal article supplement (PMC4490127)
Supplement: NIHMS656493-supplement-c.pdf [file NIHMS656493-supplement-c.pdf]

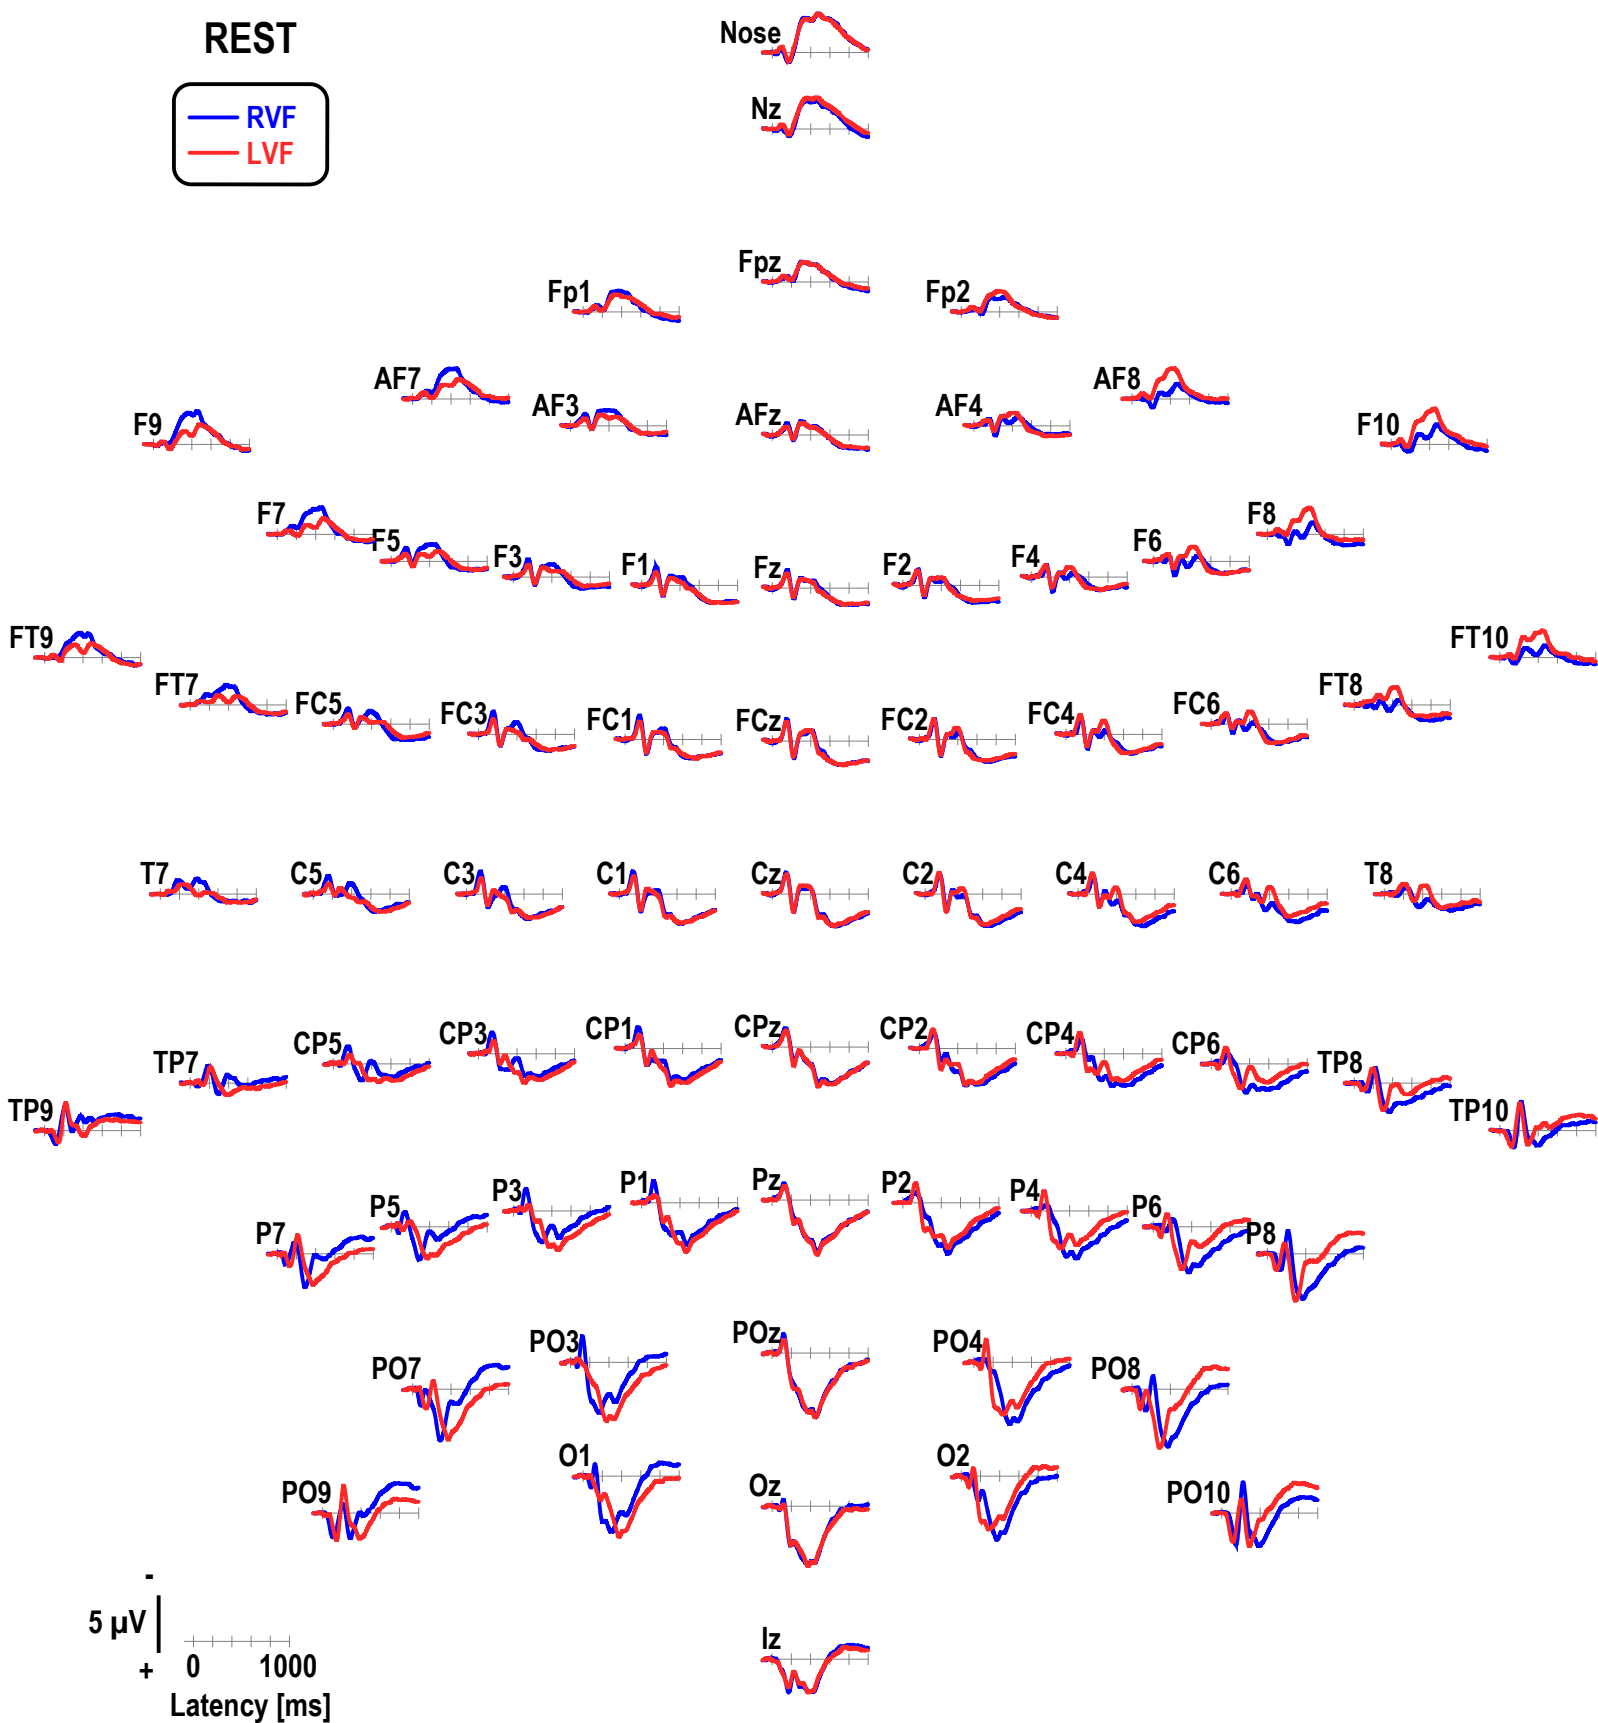

**Fig. S4.** ERPs shown in Fig. S1 referenced to infinity (REST; reference electrode standardization technique; Yao, 2001).
