# Supplementary material
Source: PubMed Central journal article supplement (PMC4490127)
Supplement: NIHMS656493-supplement-d.pdf [file NIHMS656493-supplement-d.pdf]

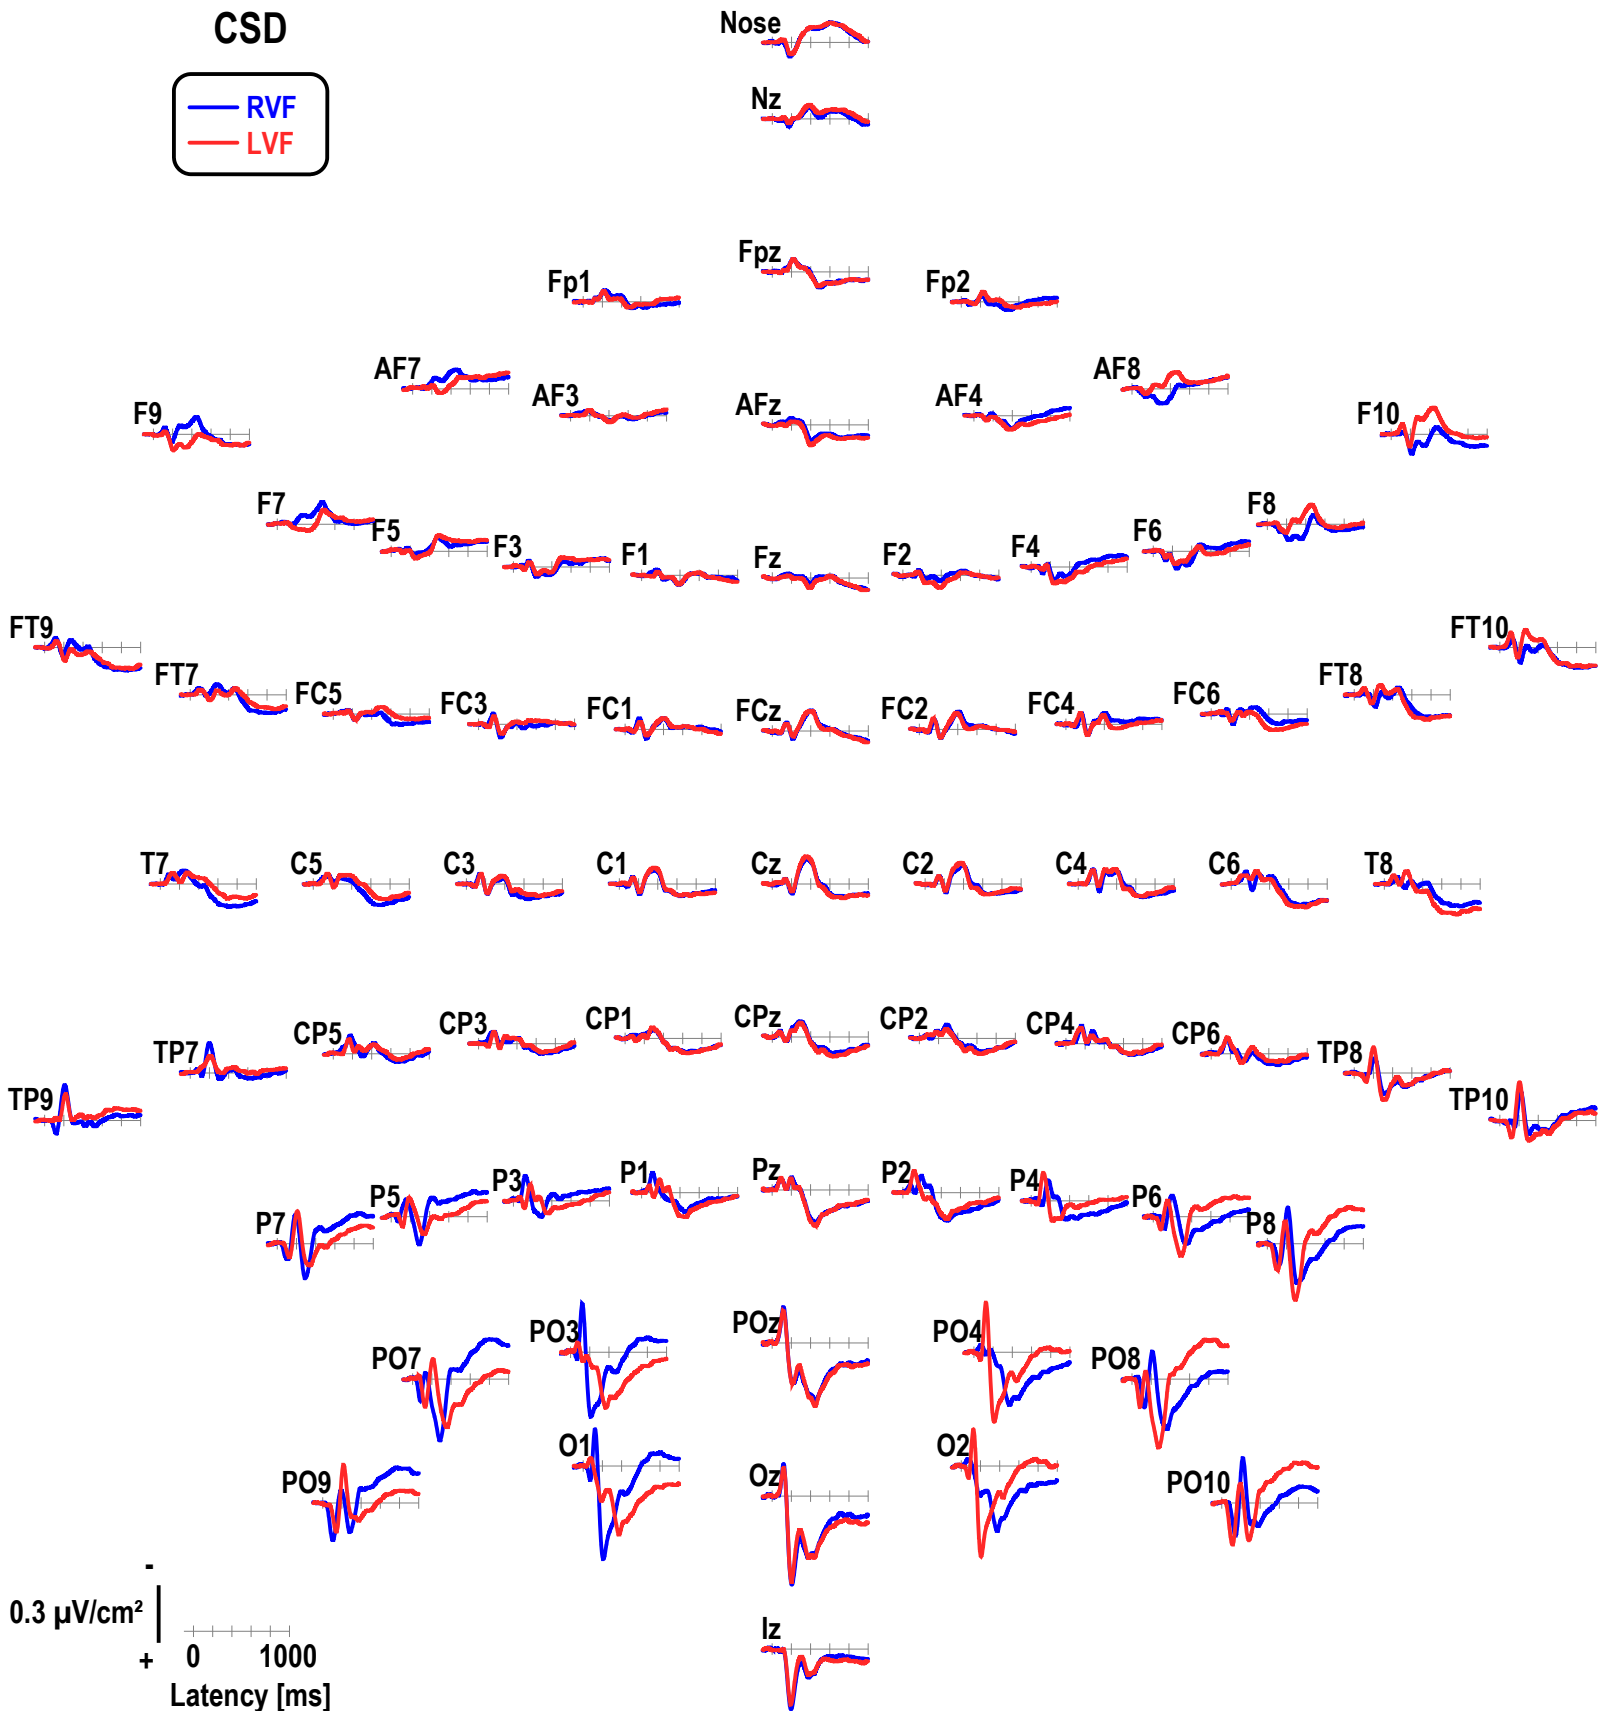

**Fig. S5.** ERPs shown in Fig. S1 transformed to current source density (CSD) [ $\mu\text{V}/\text{cm}^2$ ] waveforms using a spherical spline surface Laplacian interpolation ( $m = 4$ ,  $\lambda = 10^{-5}$ ; Perrin et al., 1989).
