# Supplementary material
Source: PubMed Central journal article supplement (PMC4490127)
Supplement: NIHMS656493-supplement-i.pdf [file NIHMS656493-supplement-i.pdf]

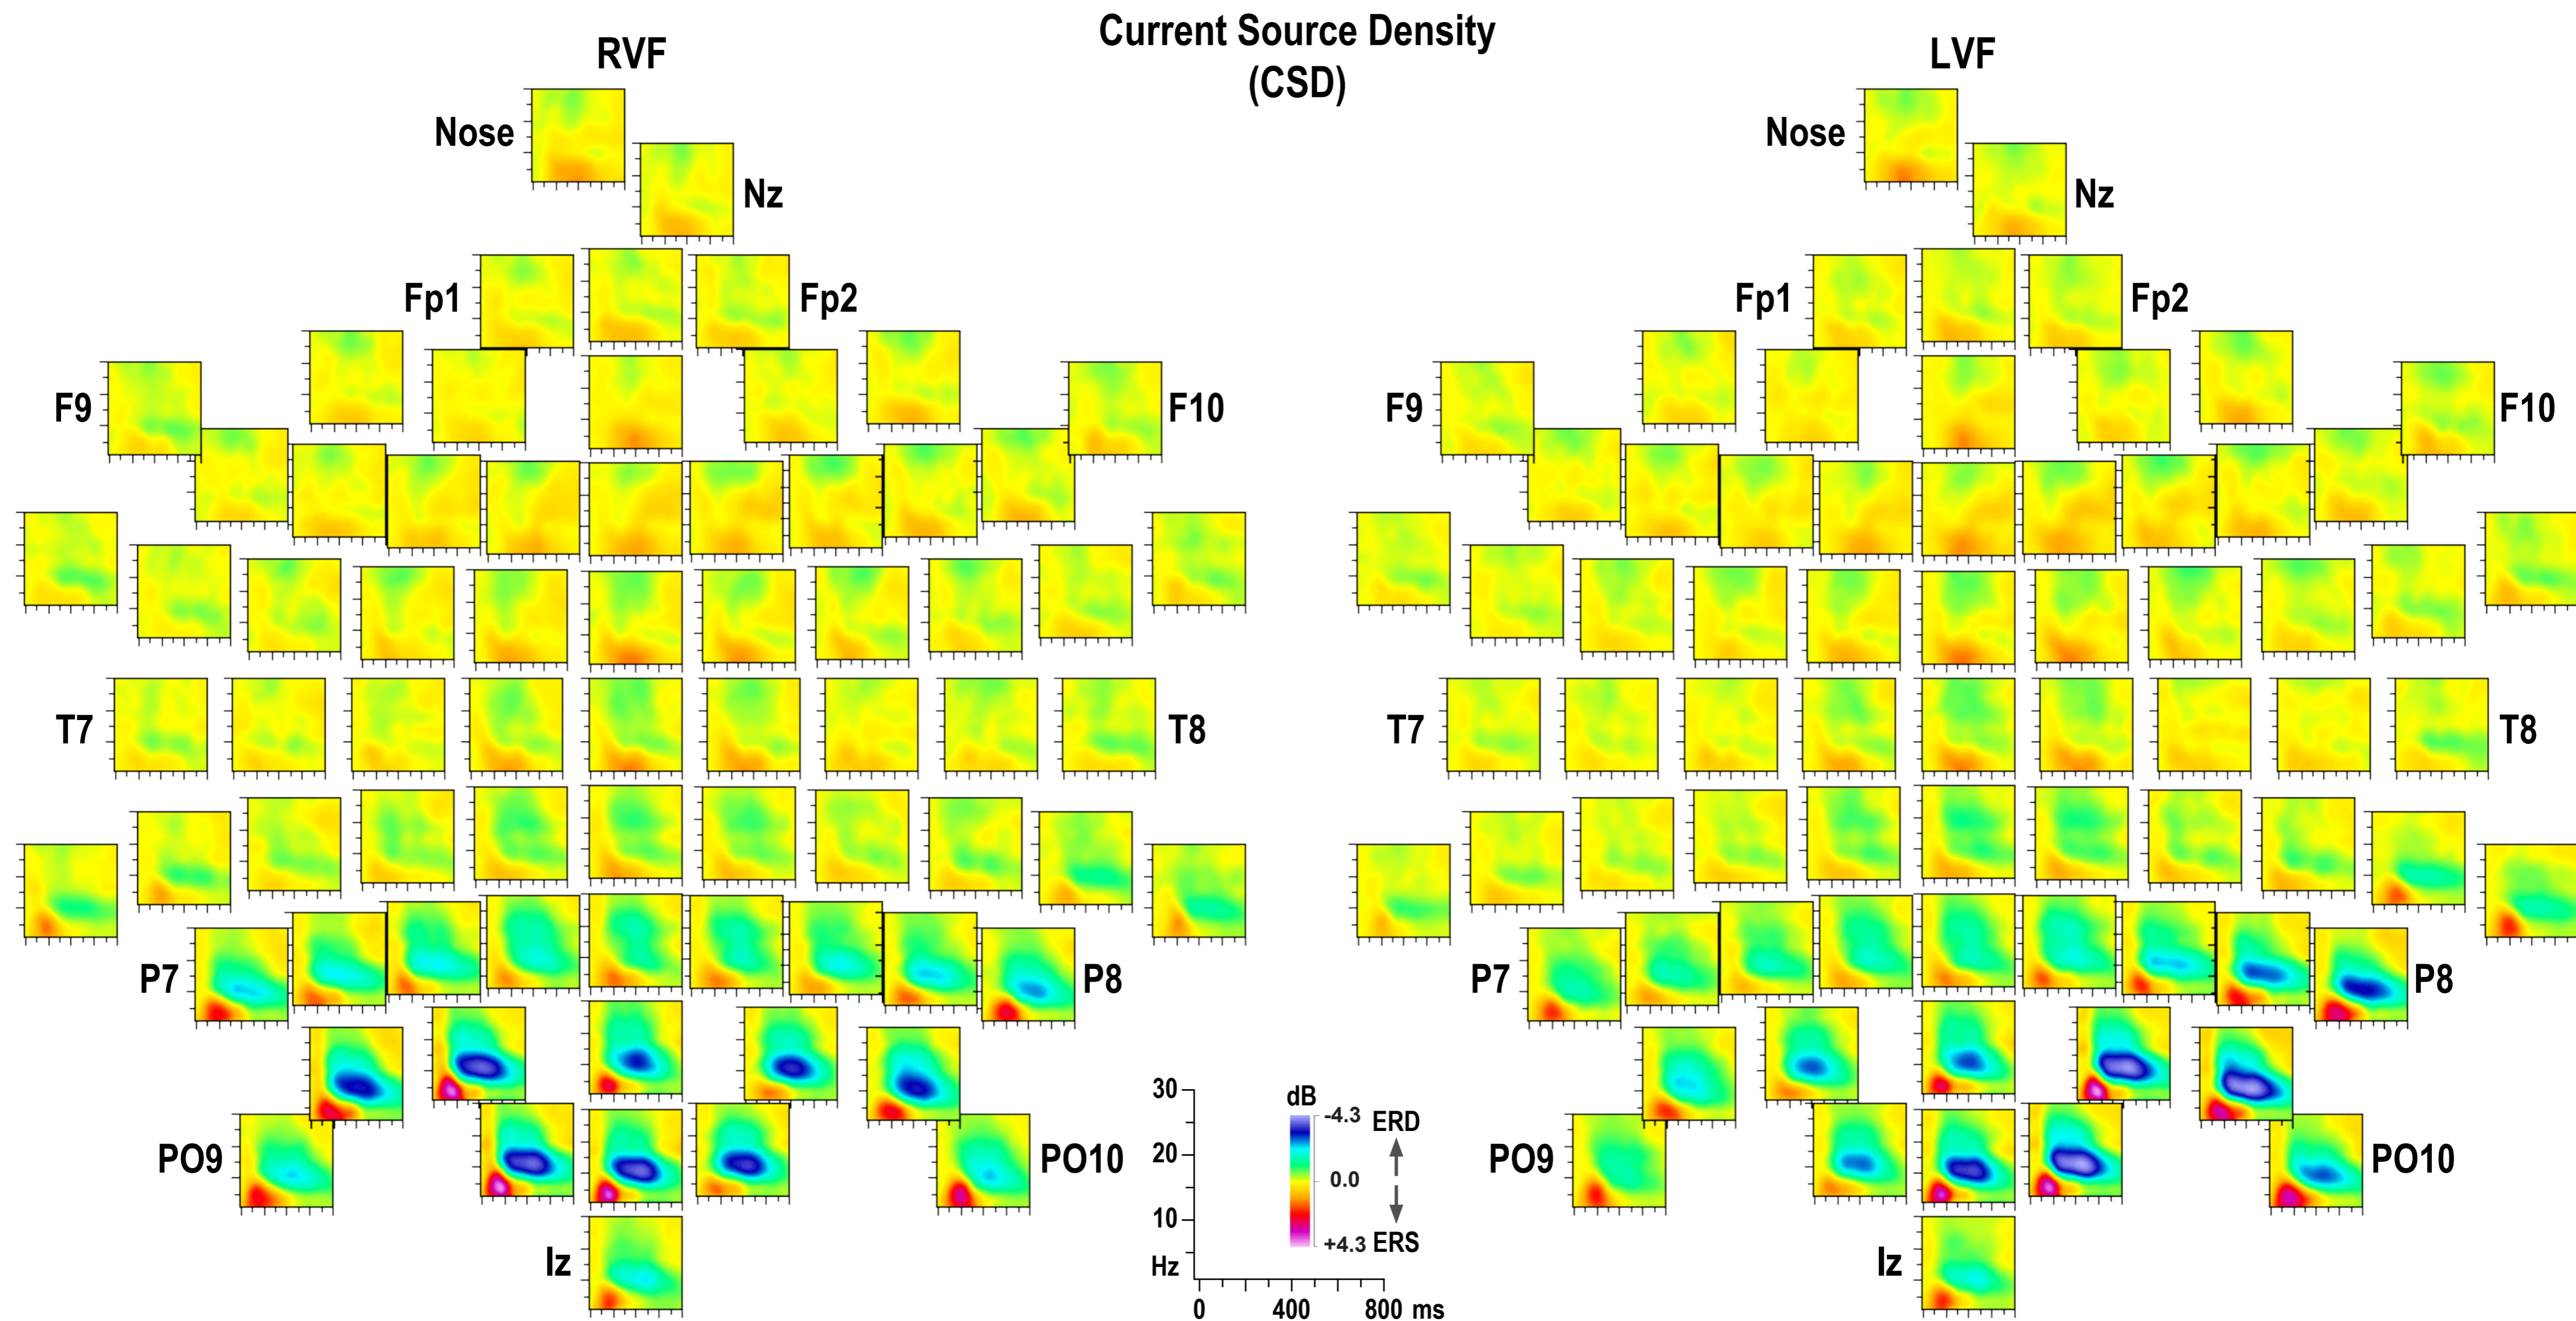

**Fig. S10.** ERSPs as shown in Fig. S6 using EEG transformed into current source density (CSD) [ $\mu\text{V}/\text{cm}^2$ ] via a spherical spline surface Laplacian interpolation ( $m = 4, \lambda = 10^{-5}$ ; Perrin et al., 1989).
