# Supplementary material
Source: PubMed Central journal article supplement (PMC4490127)
Supplement: NIHMS656493-supplement-j.pdf [file NIHMS656493-supplement-j.pdf]

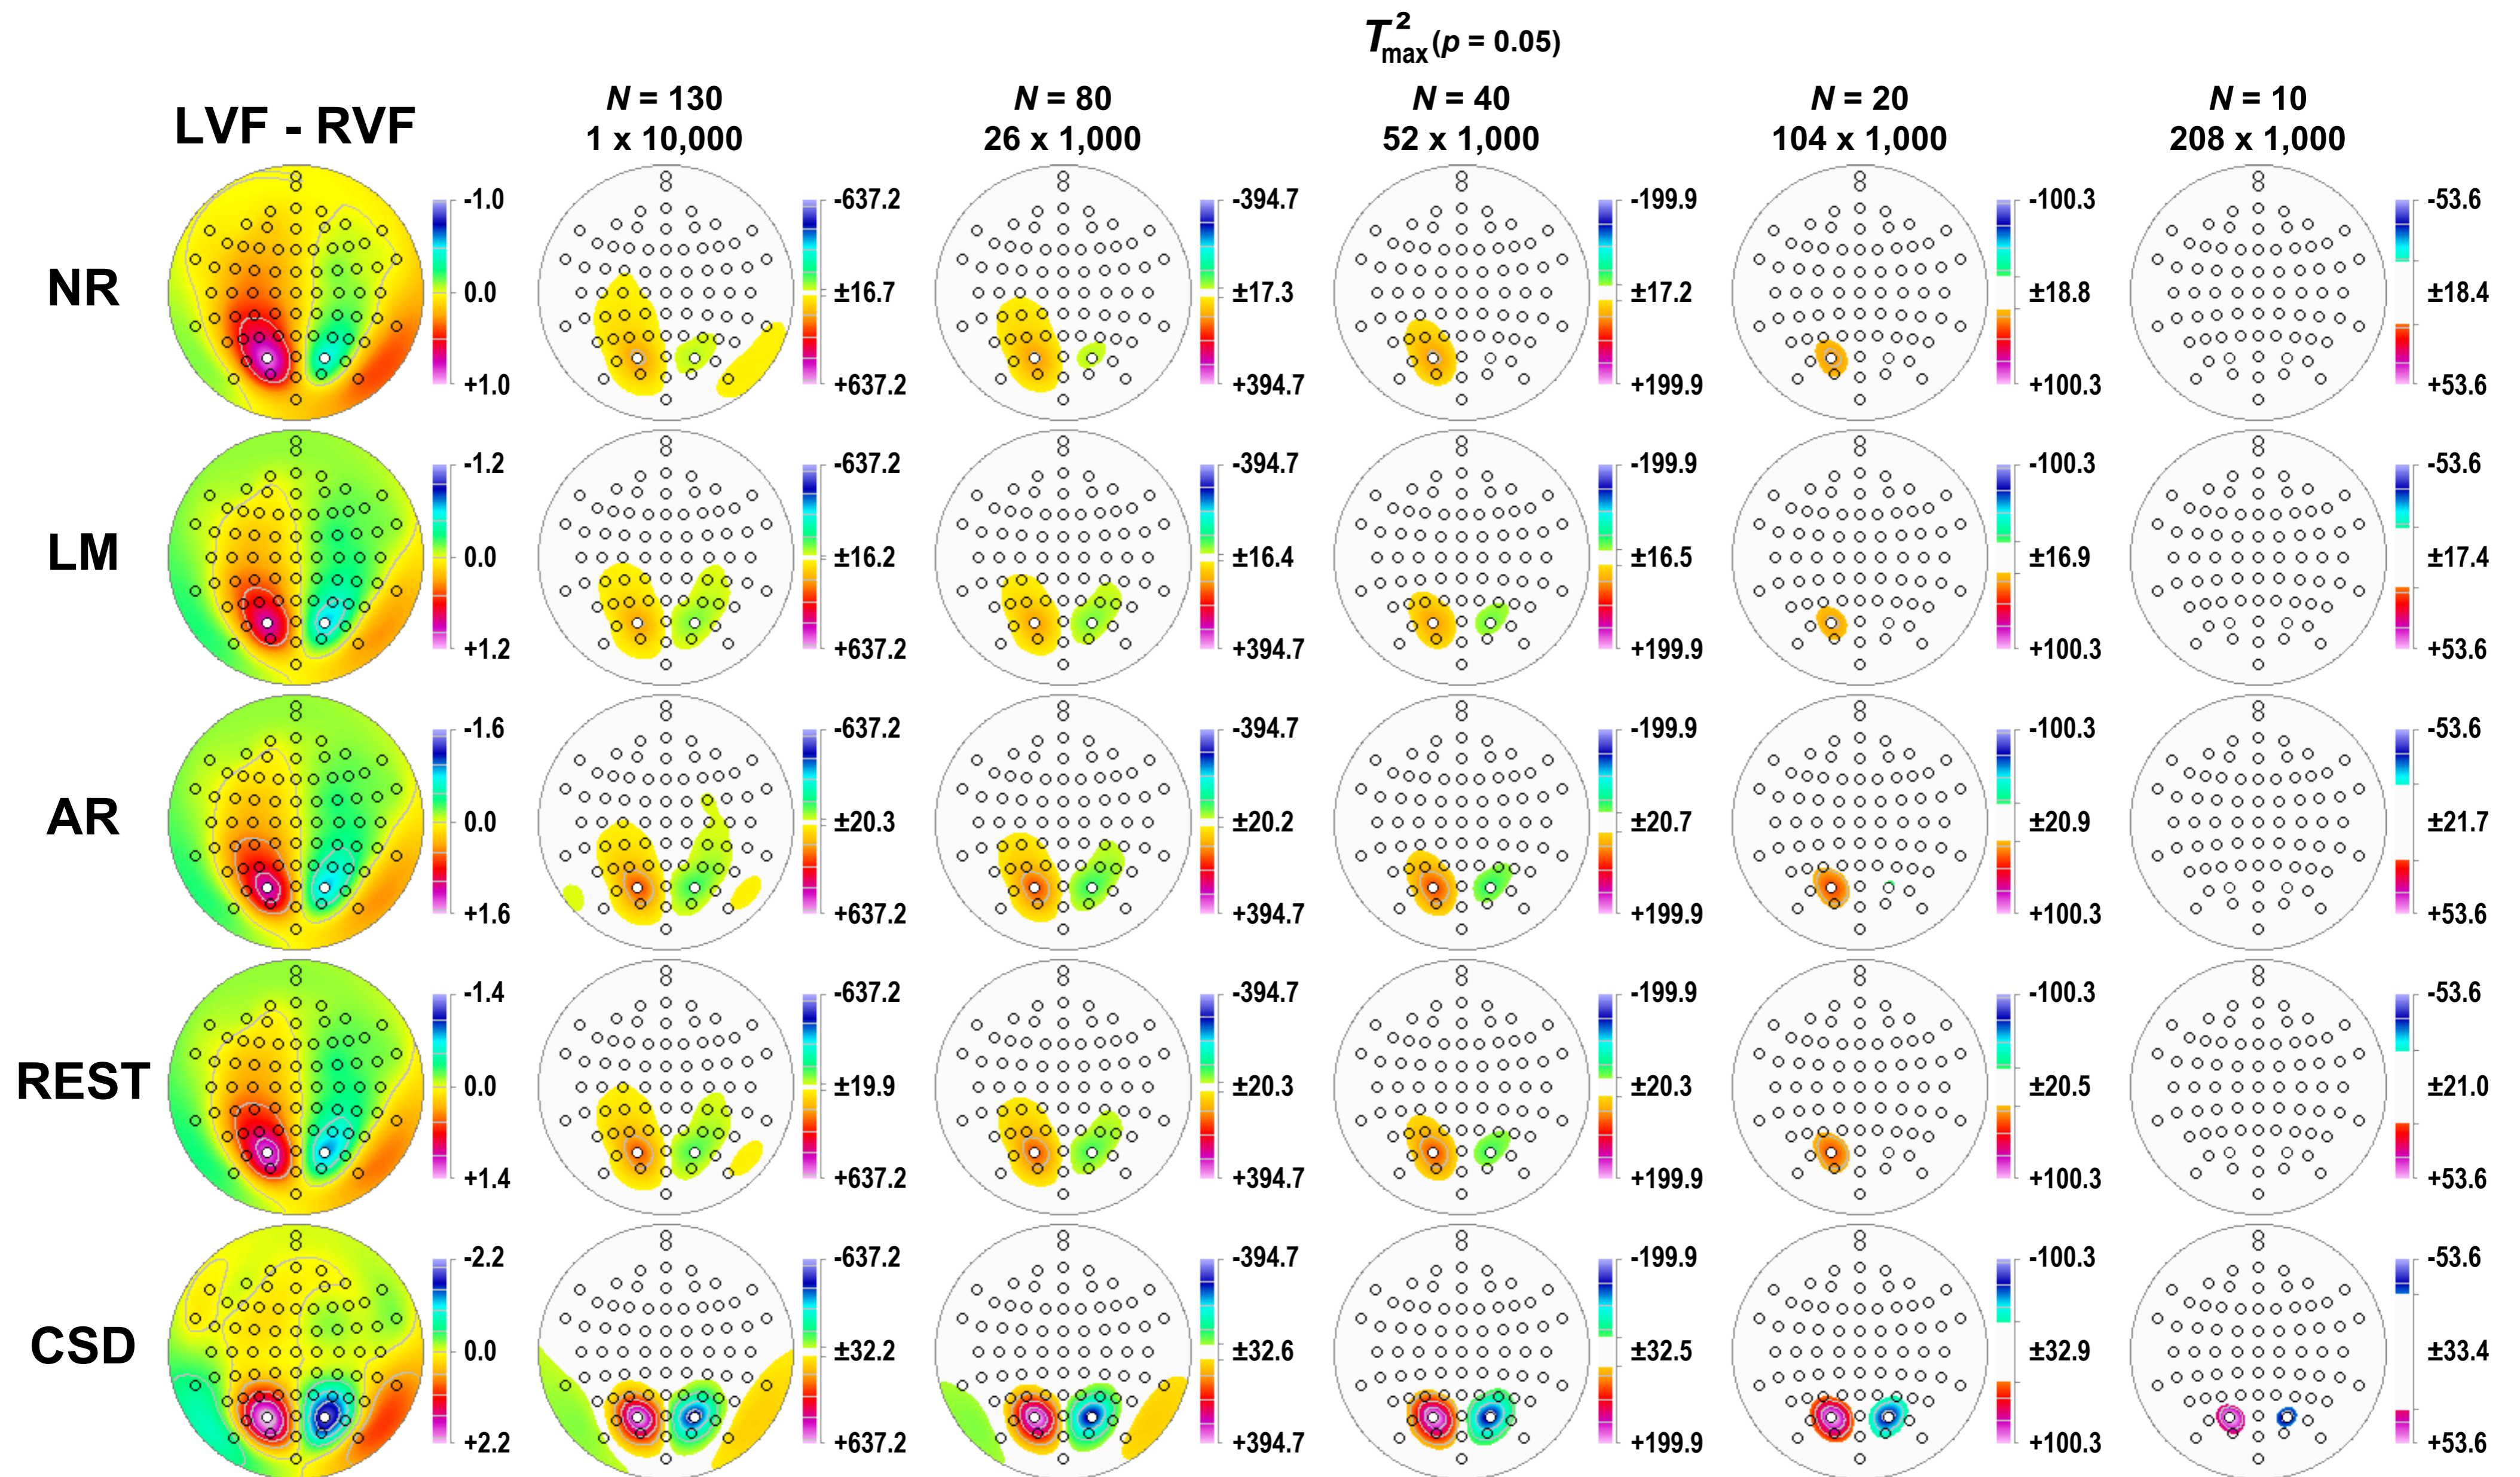

**Fig. S11.** Statistical evaluation of topographic visual field effects of factor 127 (N1) as in Fig. 4, comparing the randomization tests for the full sample ( $N = 130$ ; 10,000 repetitions) with those for randomly selected subsamples ( $N = 80$ , 26 draws;  $N = 40$ , 52 draws;  $N = 20$ , 108 draws;  $N = 10$ , 208 draws; 1000 repetitions each). Shown are for each data transformation the mean factor score difference topographies (i.e., left [LVF] minus right [RVF] hemifield) and corresponding  $\max(T^2)$  topographies thresholded at the 95<sup>th</sup> quantile ( $p = 0.05$ ). For subsamples, mean  $T^2$  statistics were evaluated with the cumulative randomization distribution resulting from the product of draws and repetitions.
