# Supplementary material
Source: PubMed Central journal article supplement (PMC4490127)
Supplement: NIHMS656493-supplement-k.pdf [file NIHMS656493-supplement-k.pdf]

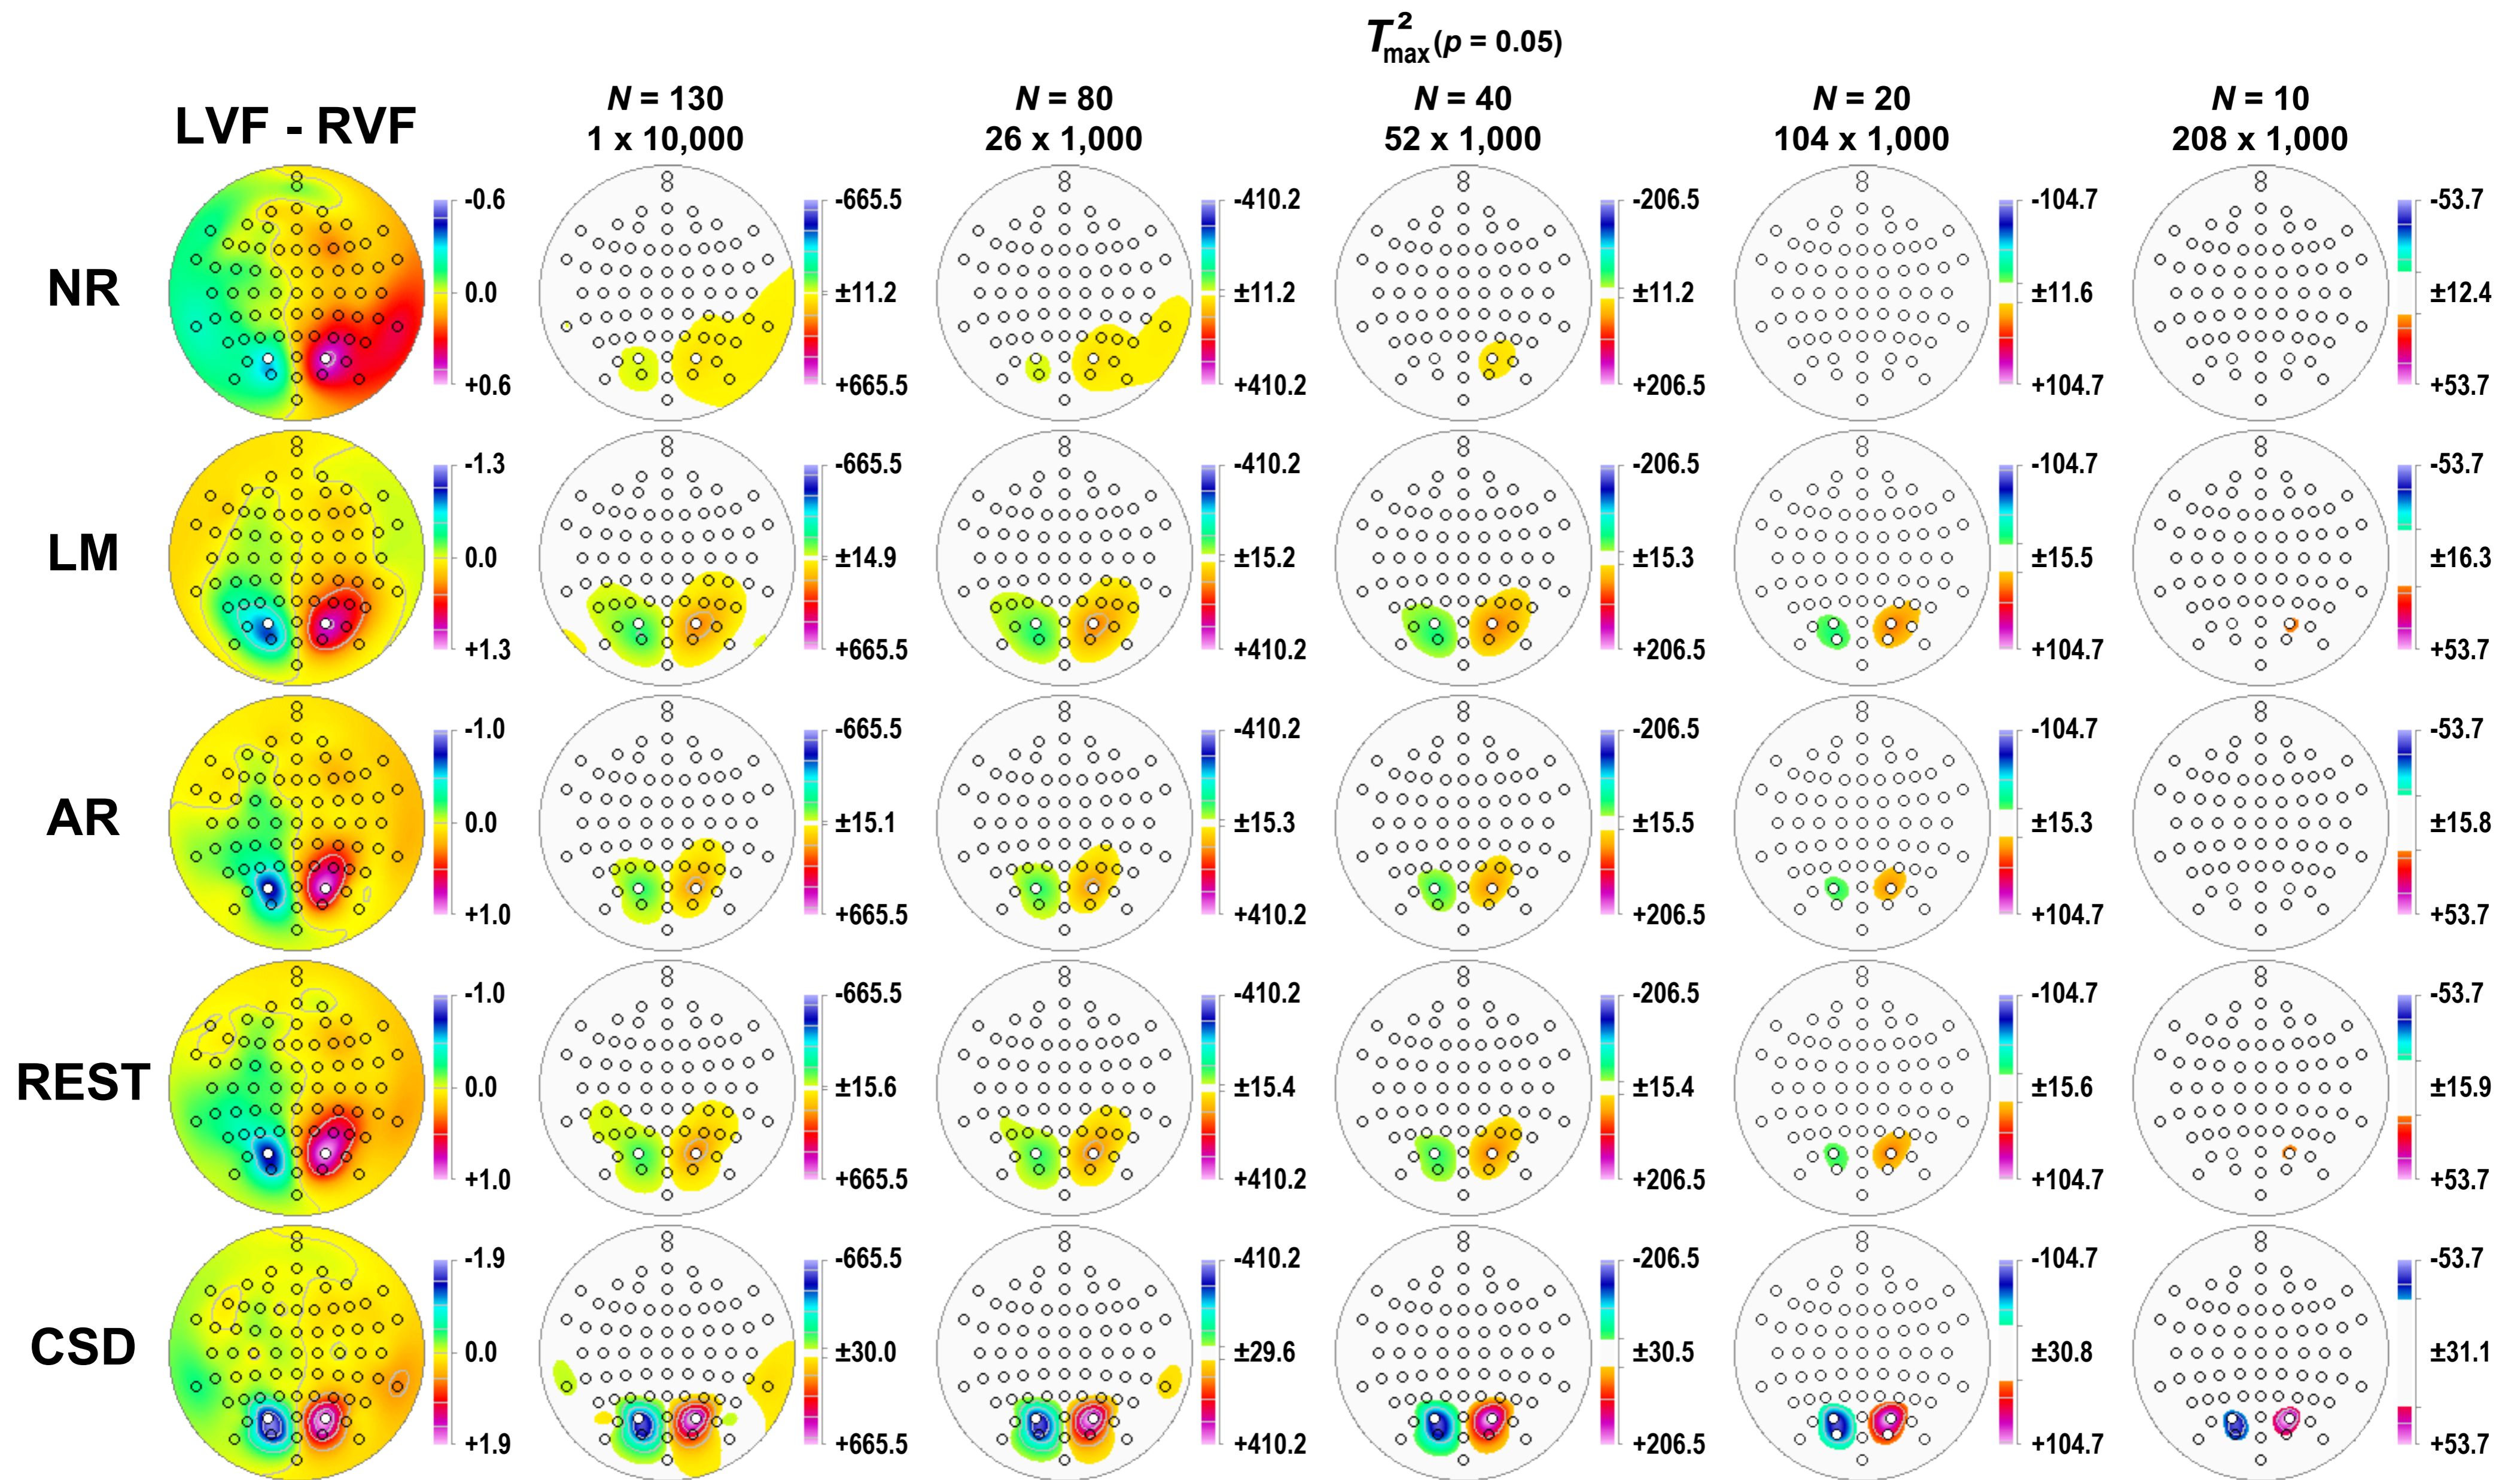

**Fig. S12.** Statistical evaluation of topographic visual field effects of factor 160-4 (N1 delta ERS) as in Fig. S11.
