# Supplementary material
Source: PubMed Central journal article supplement (PMC4490127)
Supplement: NIHMS656493-supplement-l.pdf [file NIHMS656493-supplement-l.pdf]

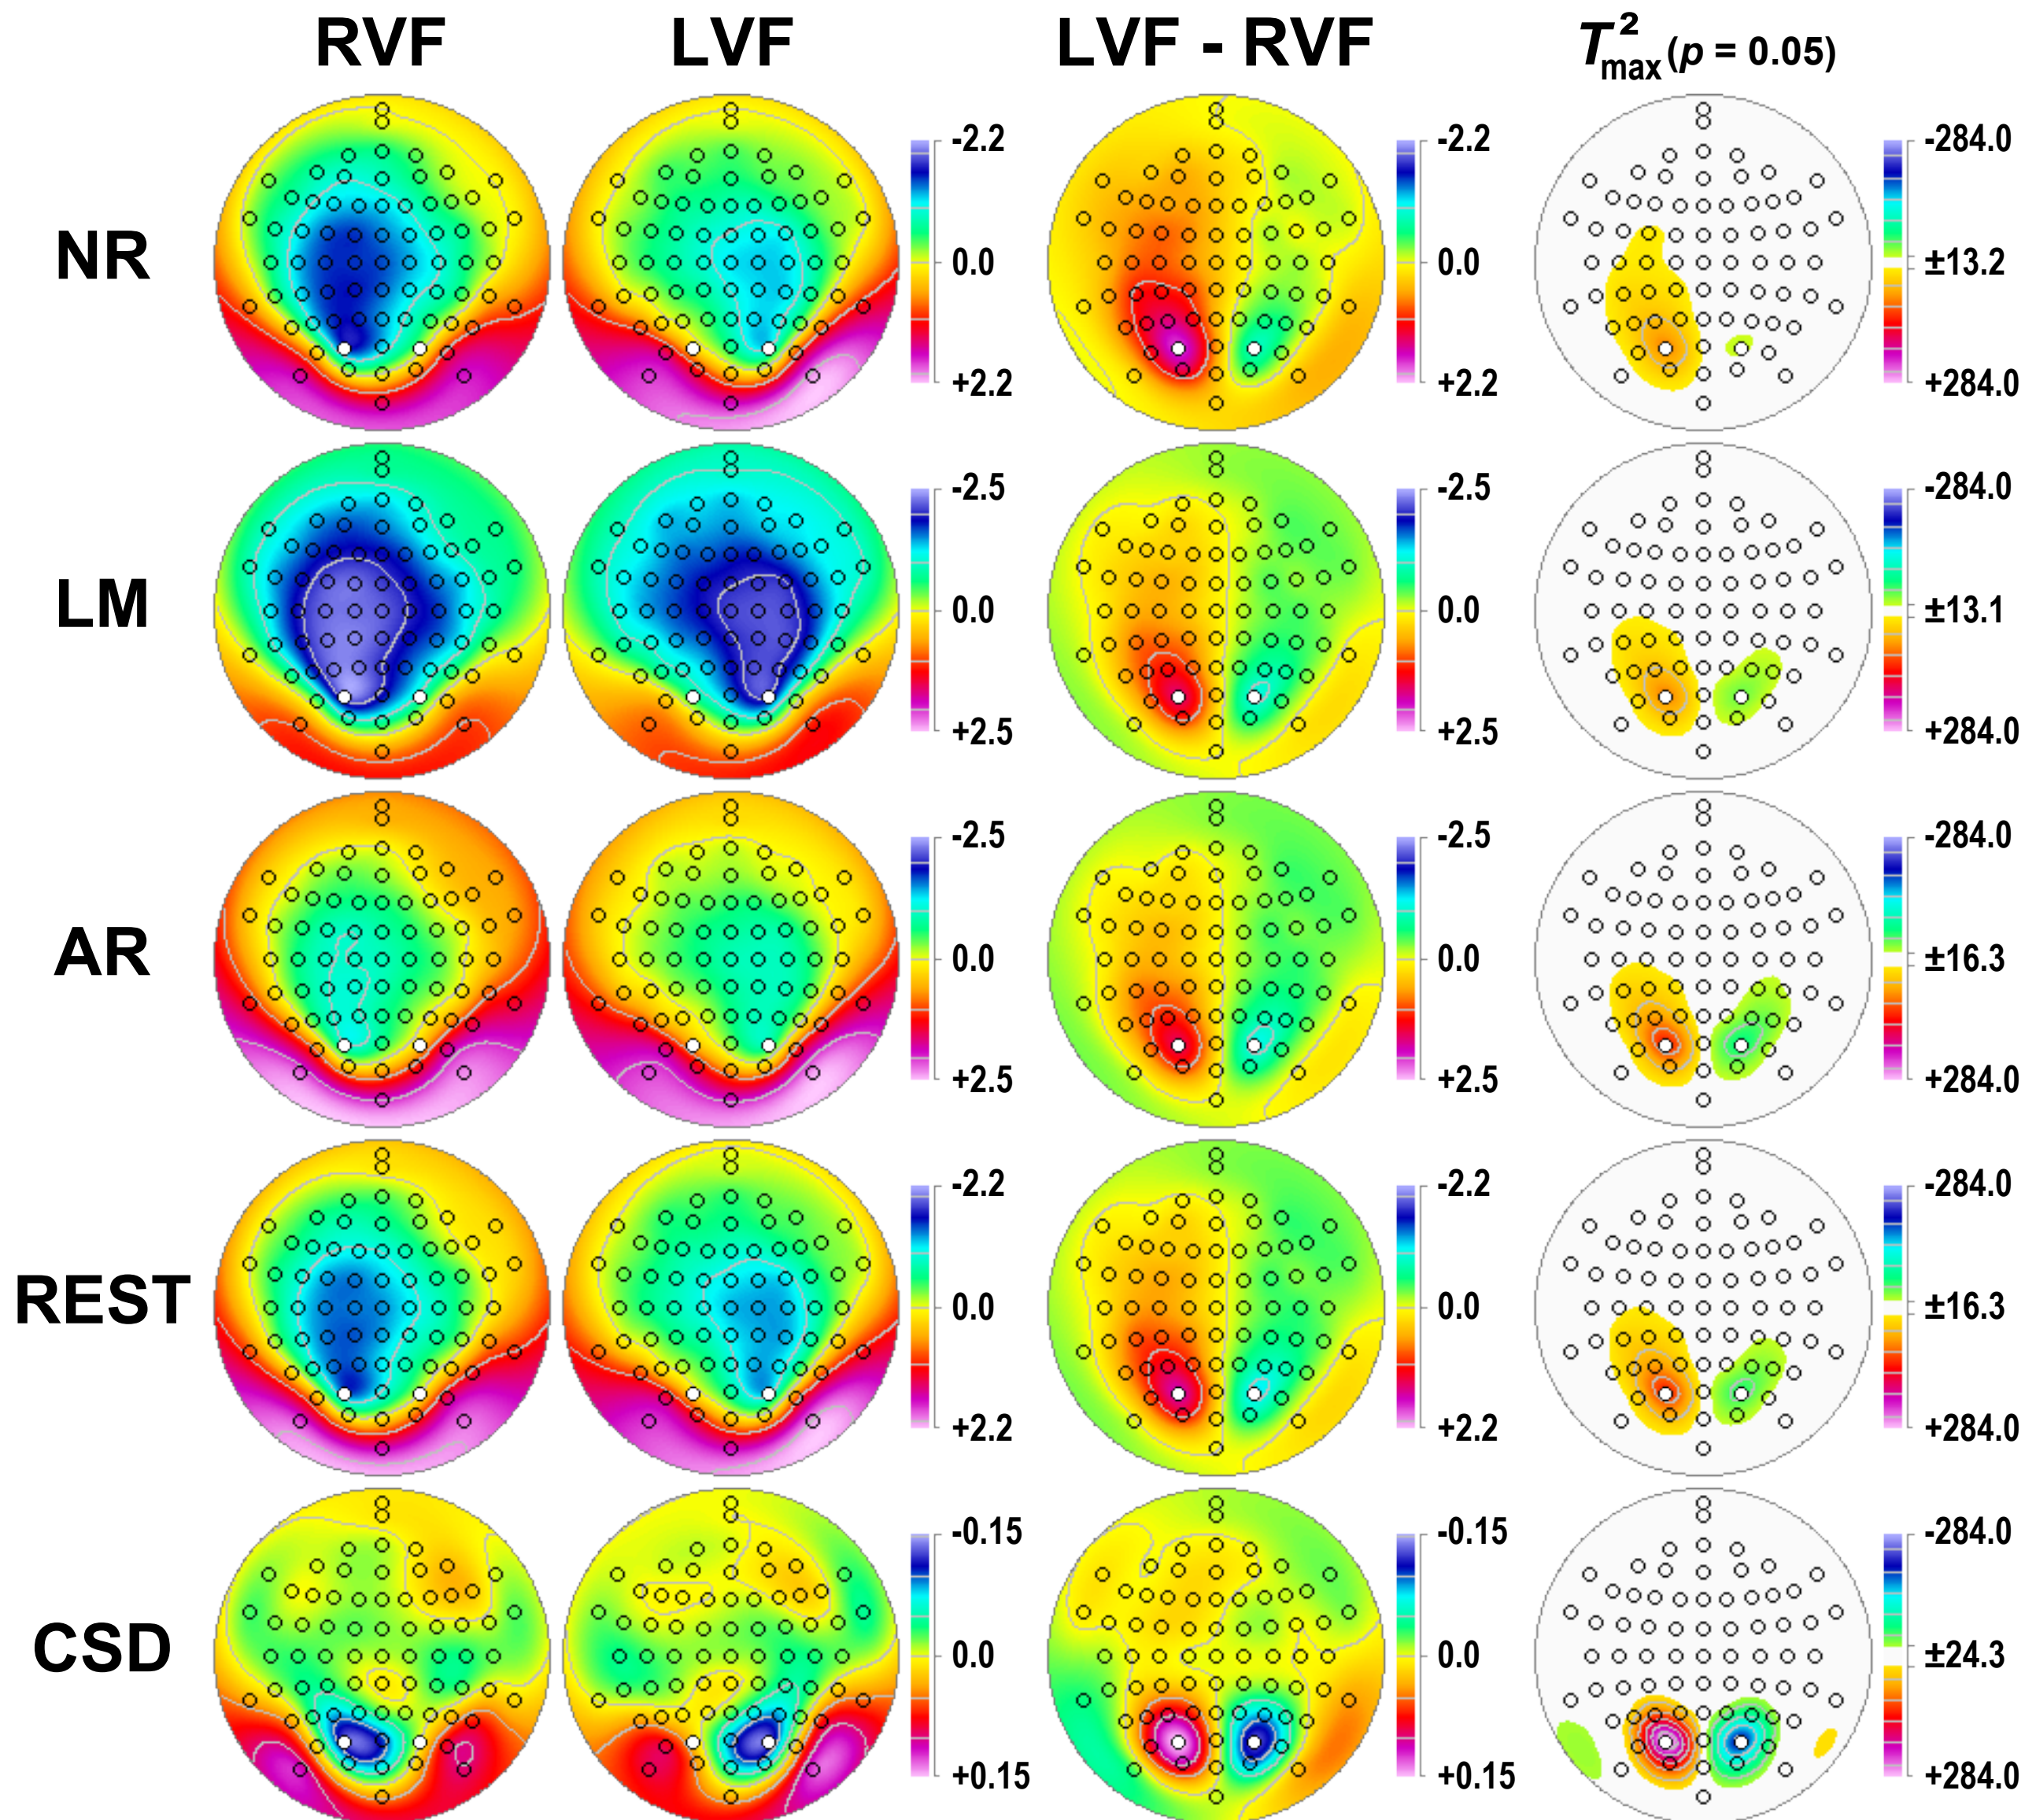

**Fig. S13.** Statistical evaluation of topographic visual field effects of N1 amplitude (time window 90–160 ms) as in Fig. 4.
