# Supplementary material
Source: PubMed Central journal article supplement (PMC4490127)
Supplement: NIHMS656493-supplement-m.pdf [file NIHMS656493-supplement-m.pdf]

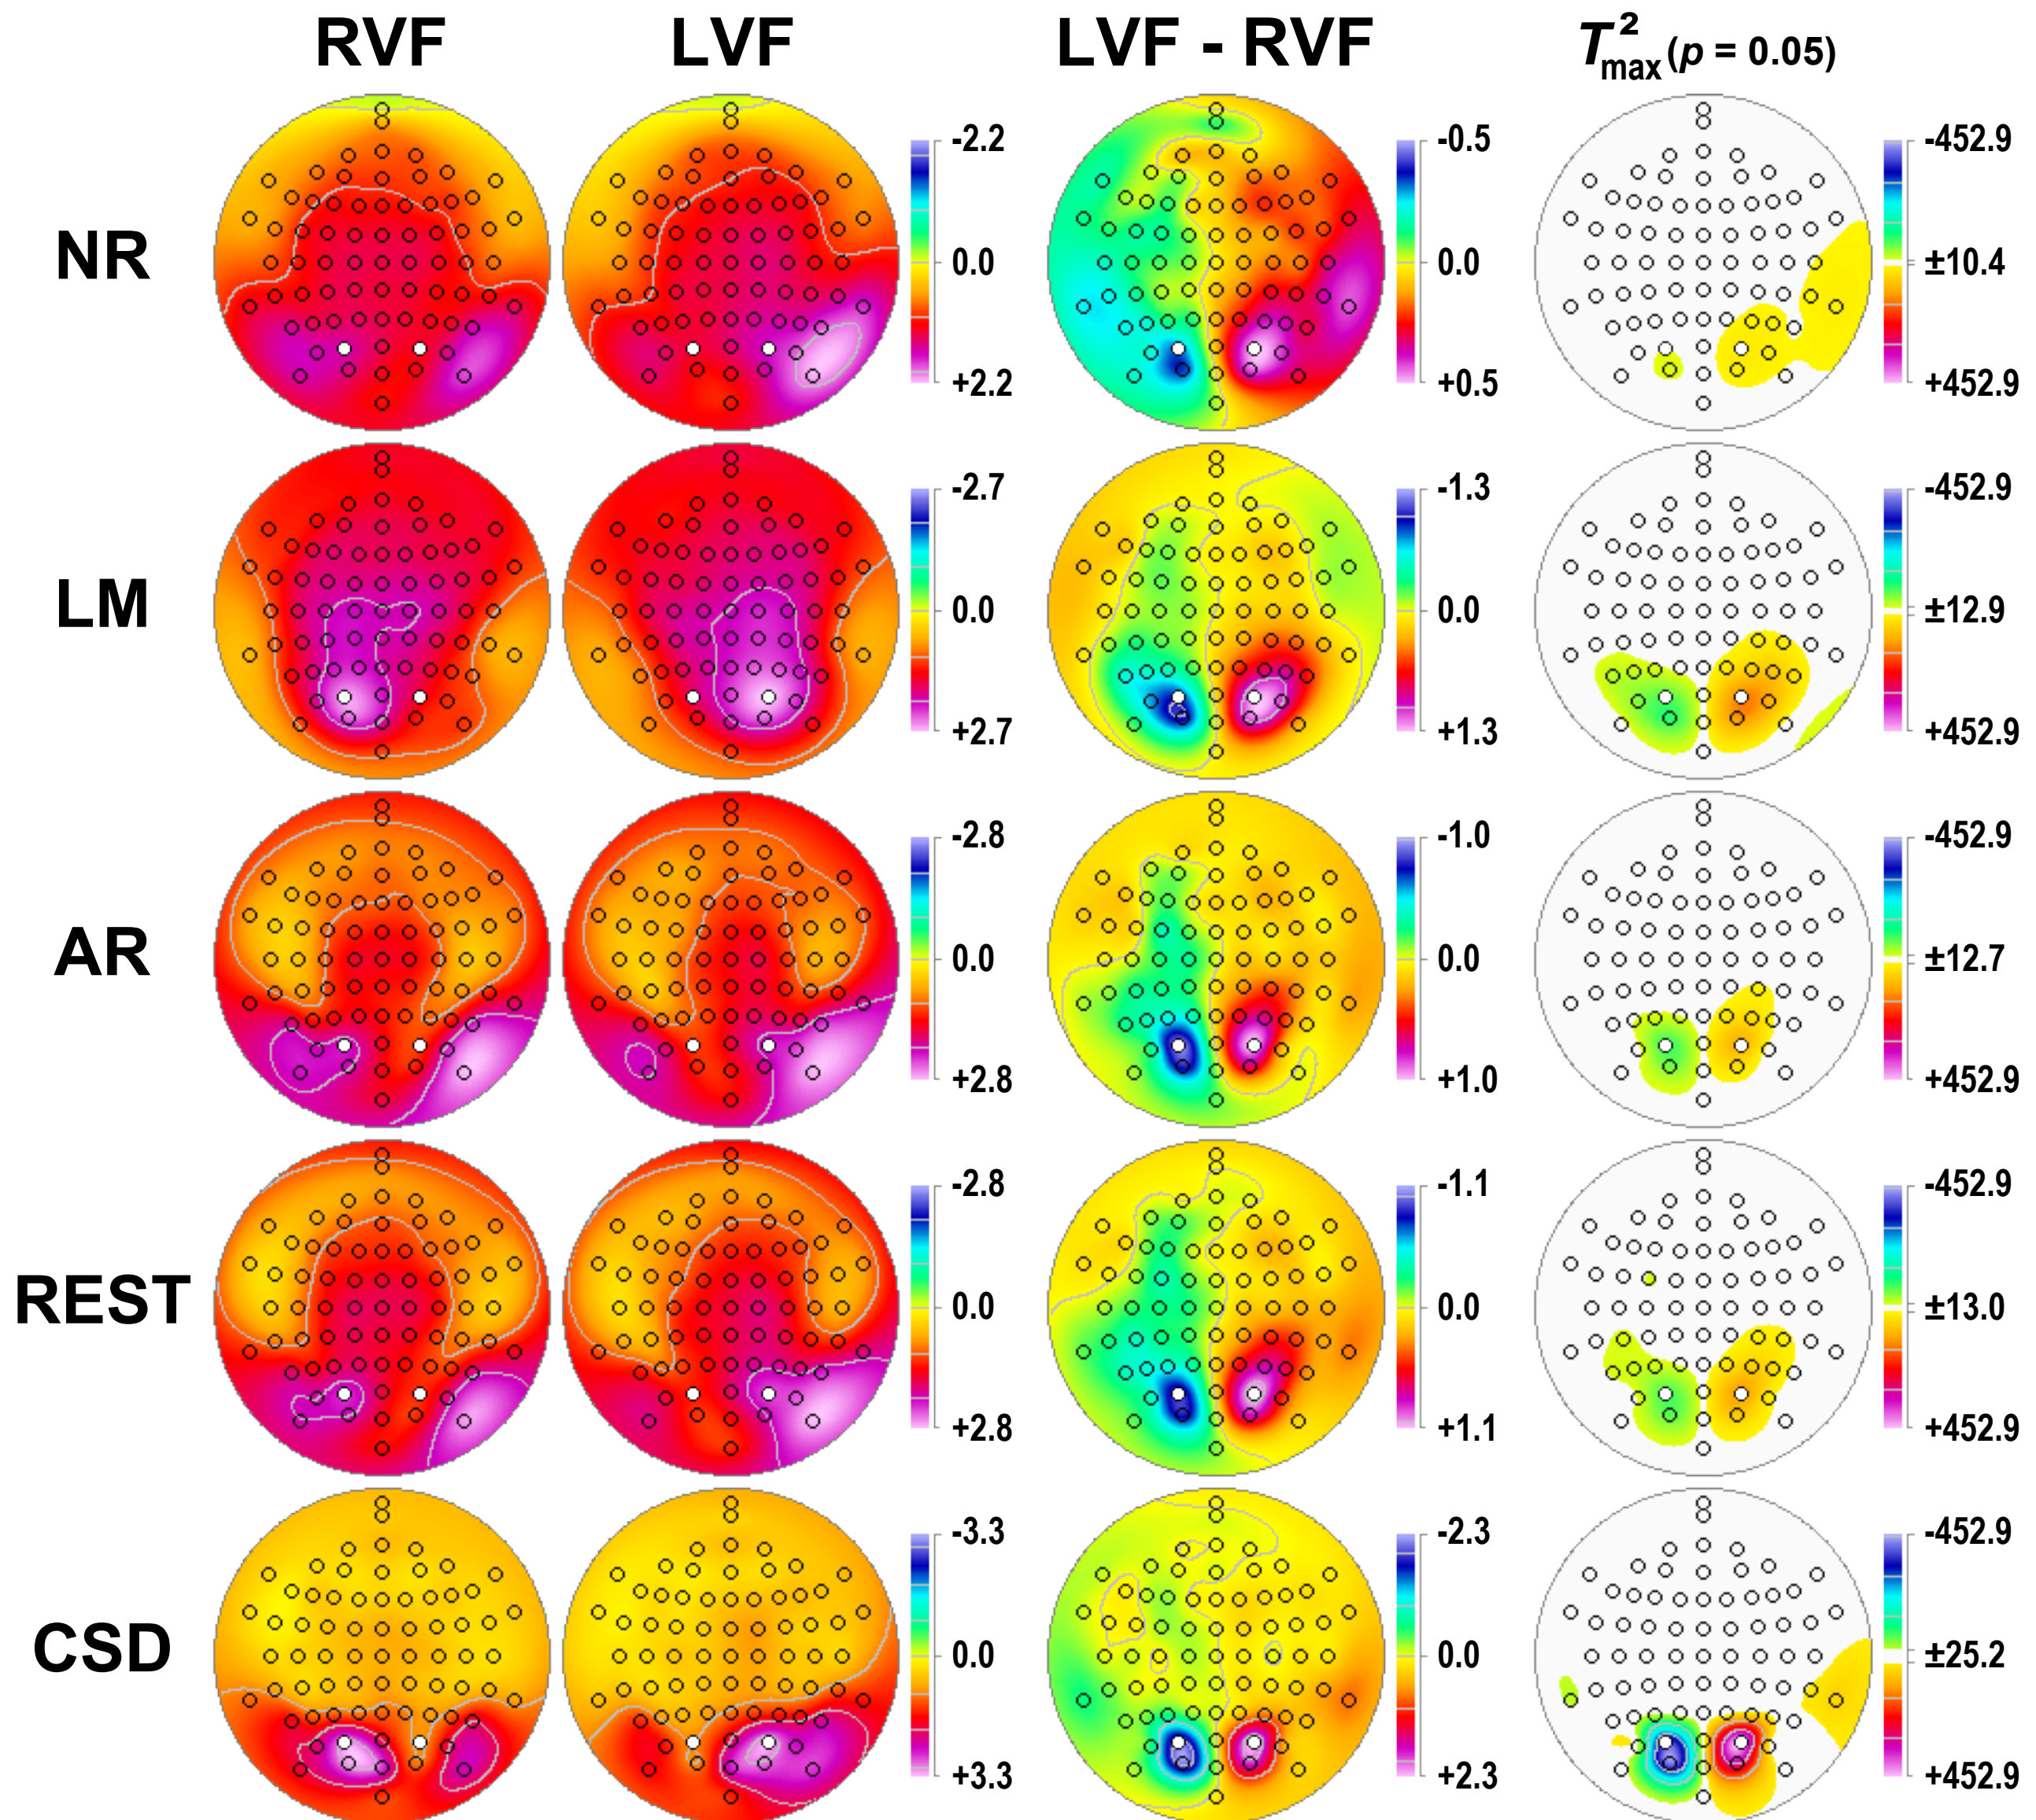

**Fig. S14.** Statistical evaluation of topographic visual field effects of N1 delta ERS (time-frequency-window 100–250 ms/2–6 Hz) as in Fig. 7.
