# Supplementary material
Source: PubMed Central journal article supplement (PMC4490127)
Supplement: NIHMS656493-supplement.pdf [file NIHMS656493-supplement.pdf]

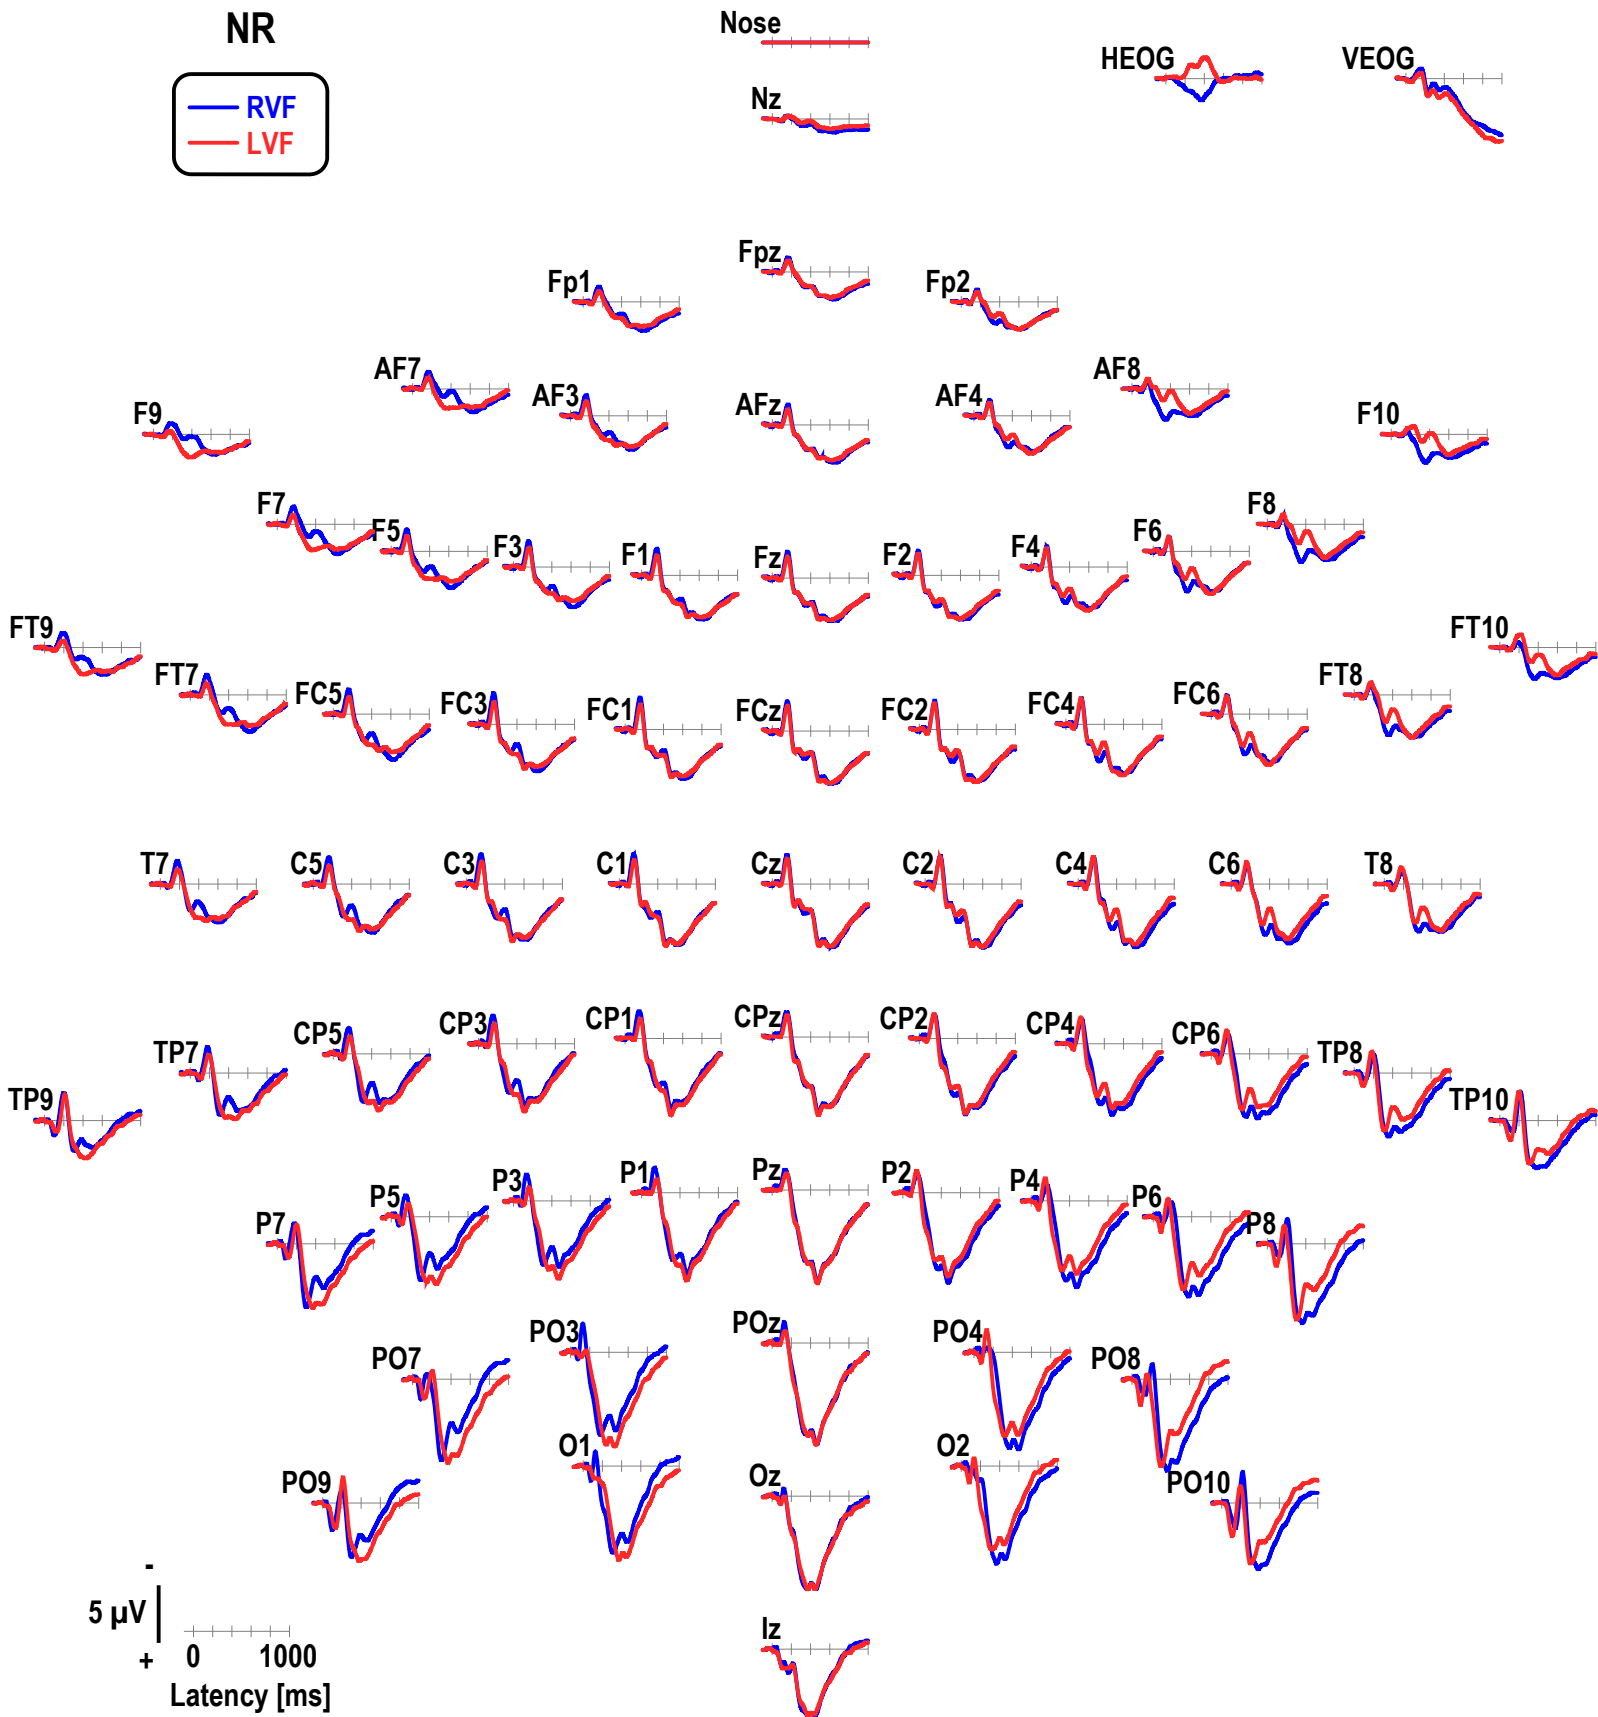

**Fig. S1.** Nose-referenced (NR), grand mean event-related surface potential (ERP) [ $\mu$ V] waveforms (–100 to 1000 ms, 100 ms prestimulus baseline) for left and right visual field presentations at all 72 recording sites. Horizontal and vertical electrooculograms (EOG) are shown before blink correction.
