# Supplementary material
Source: PubMed Central journal article supplement (PMC4490127)

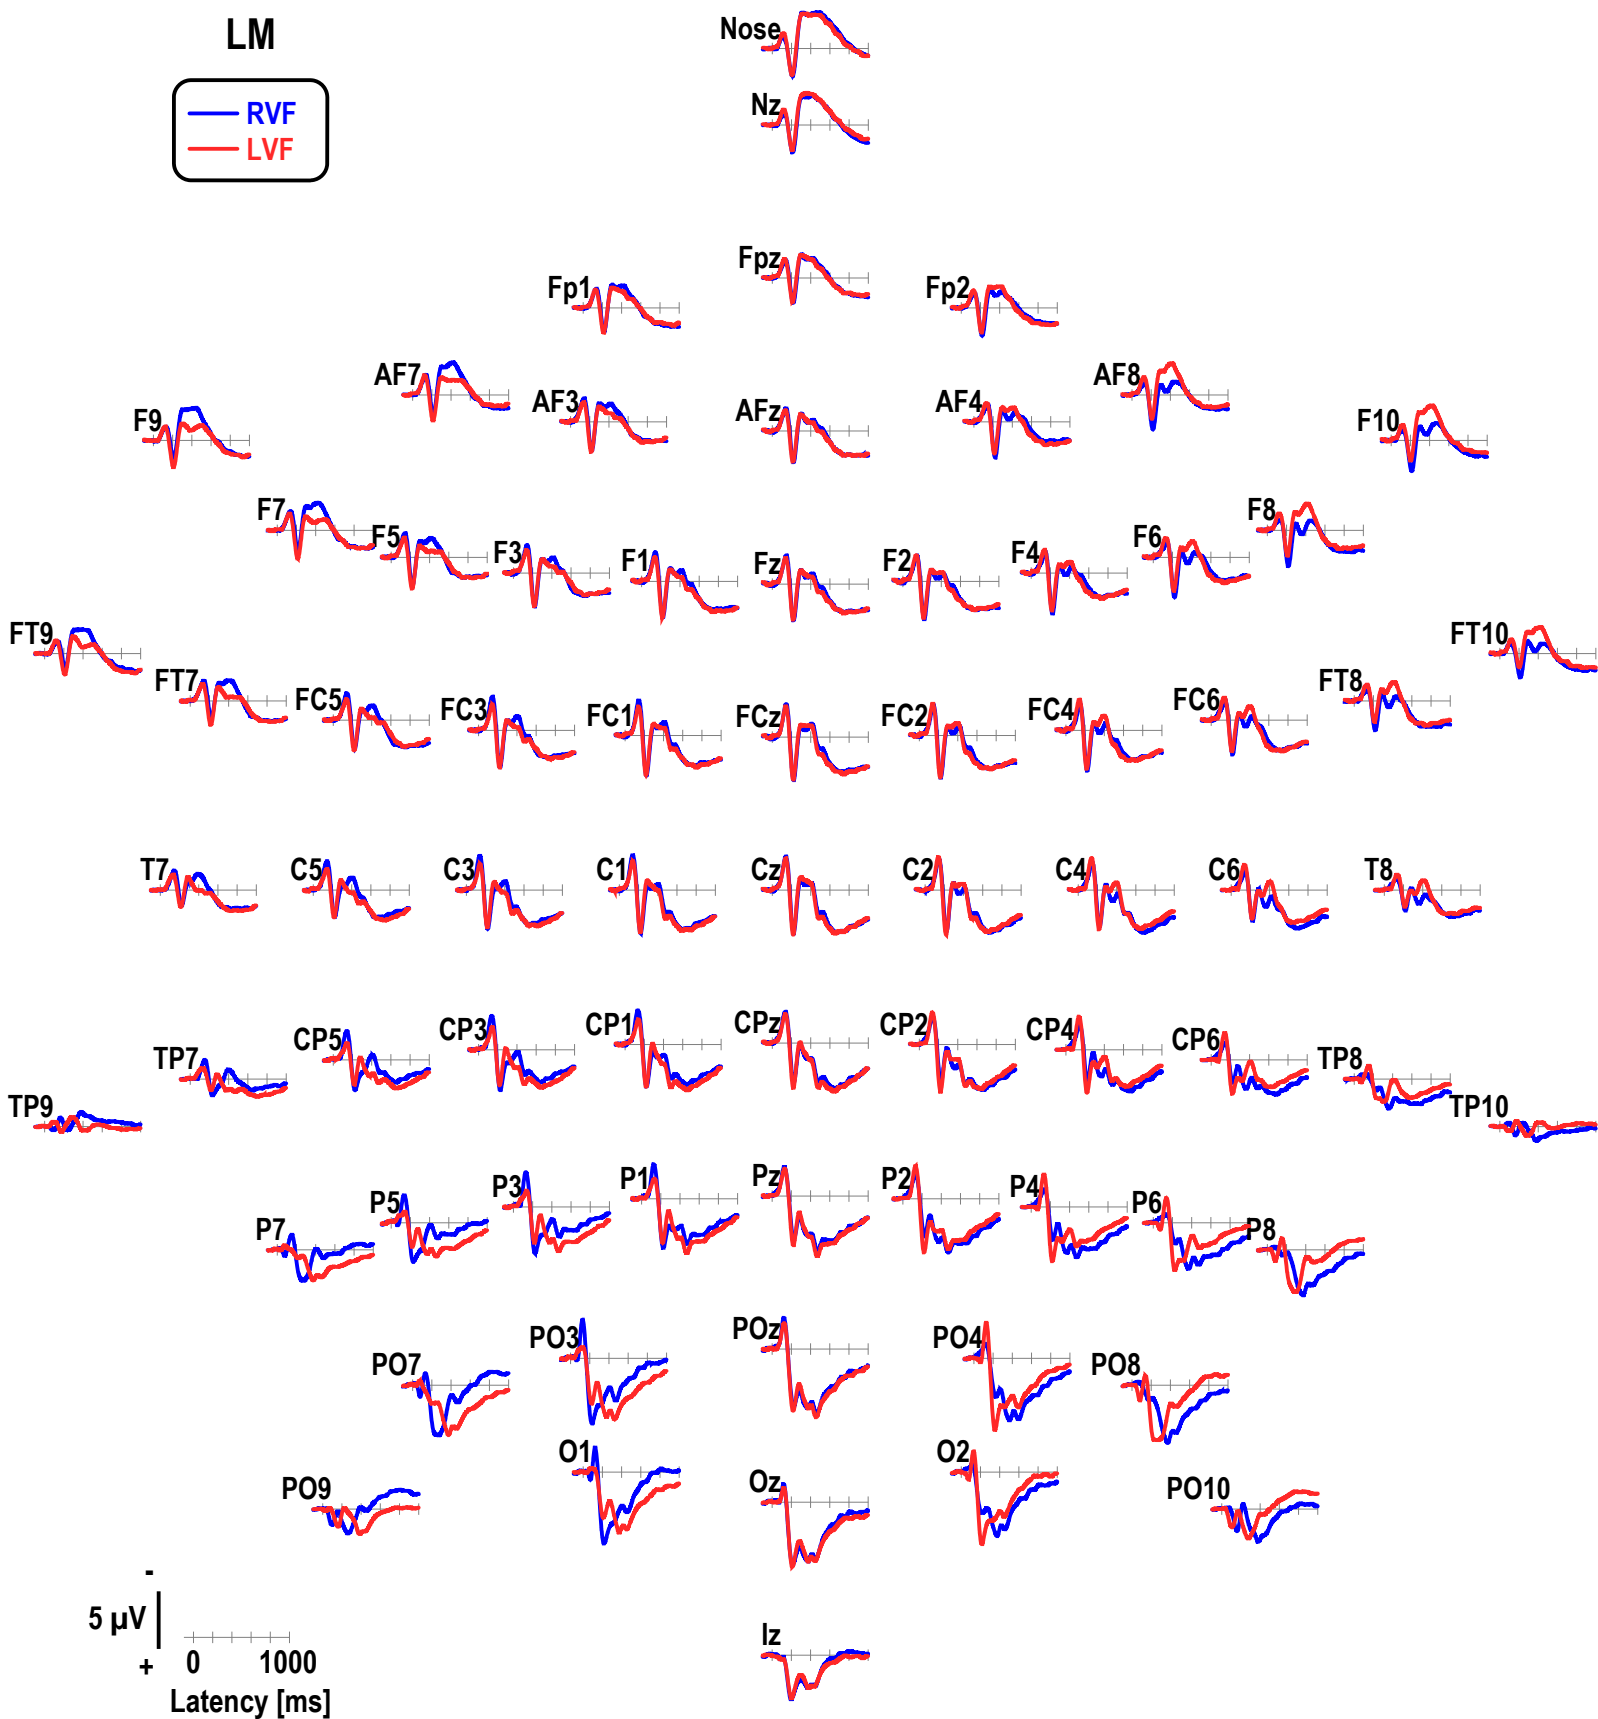

**Fig. S2.** ERPs shown in Fig. S1 referenced to linked mastoids (LM; sites TP9 and TP10).

Supplement: NIHMS656493-supplement-a.pdf [file NIHMS656493-supplement-a.pdf]

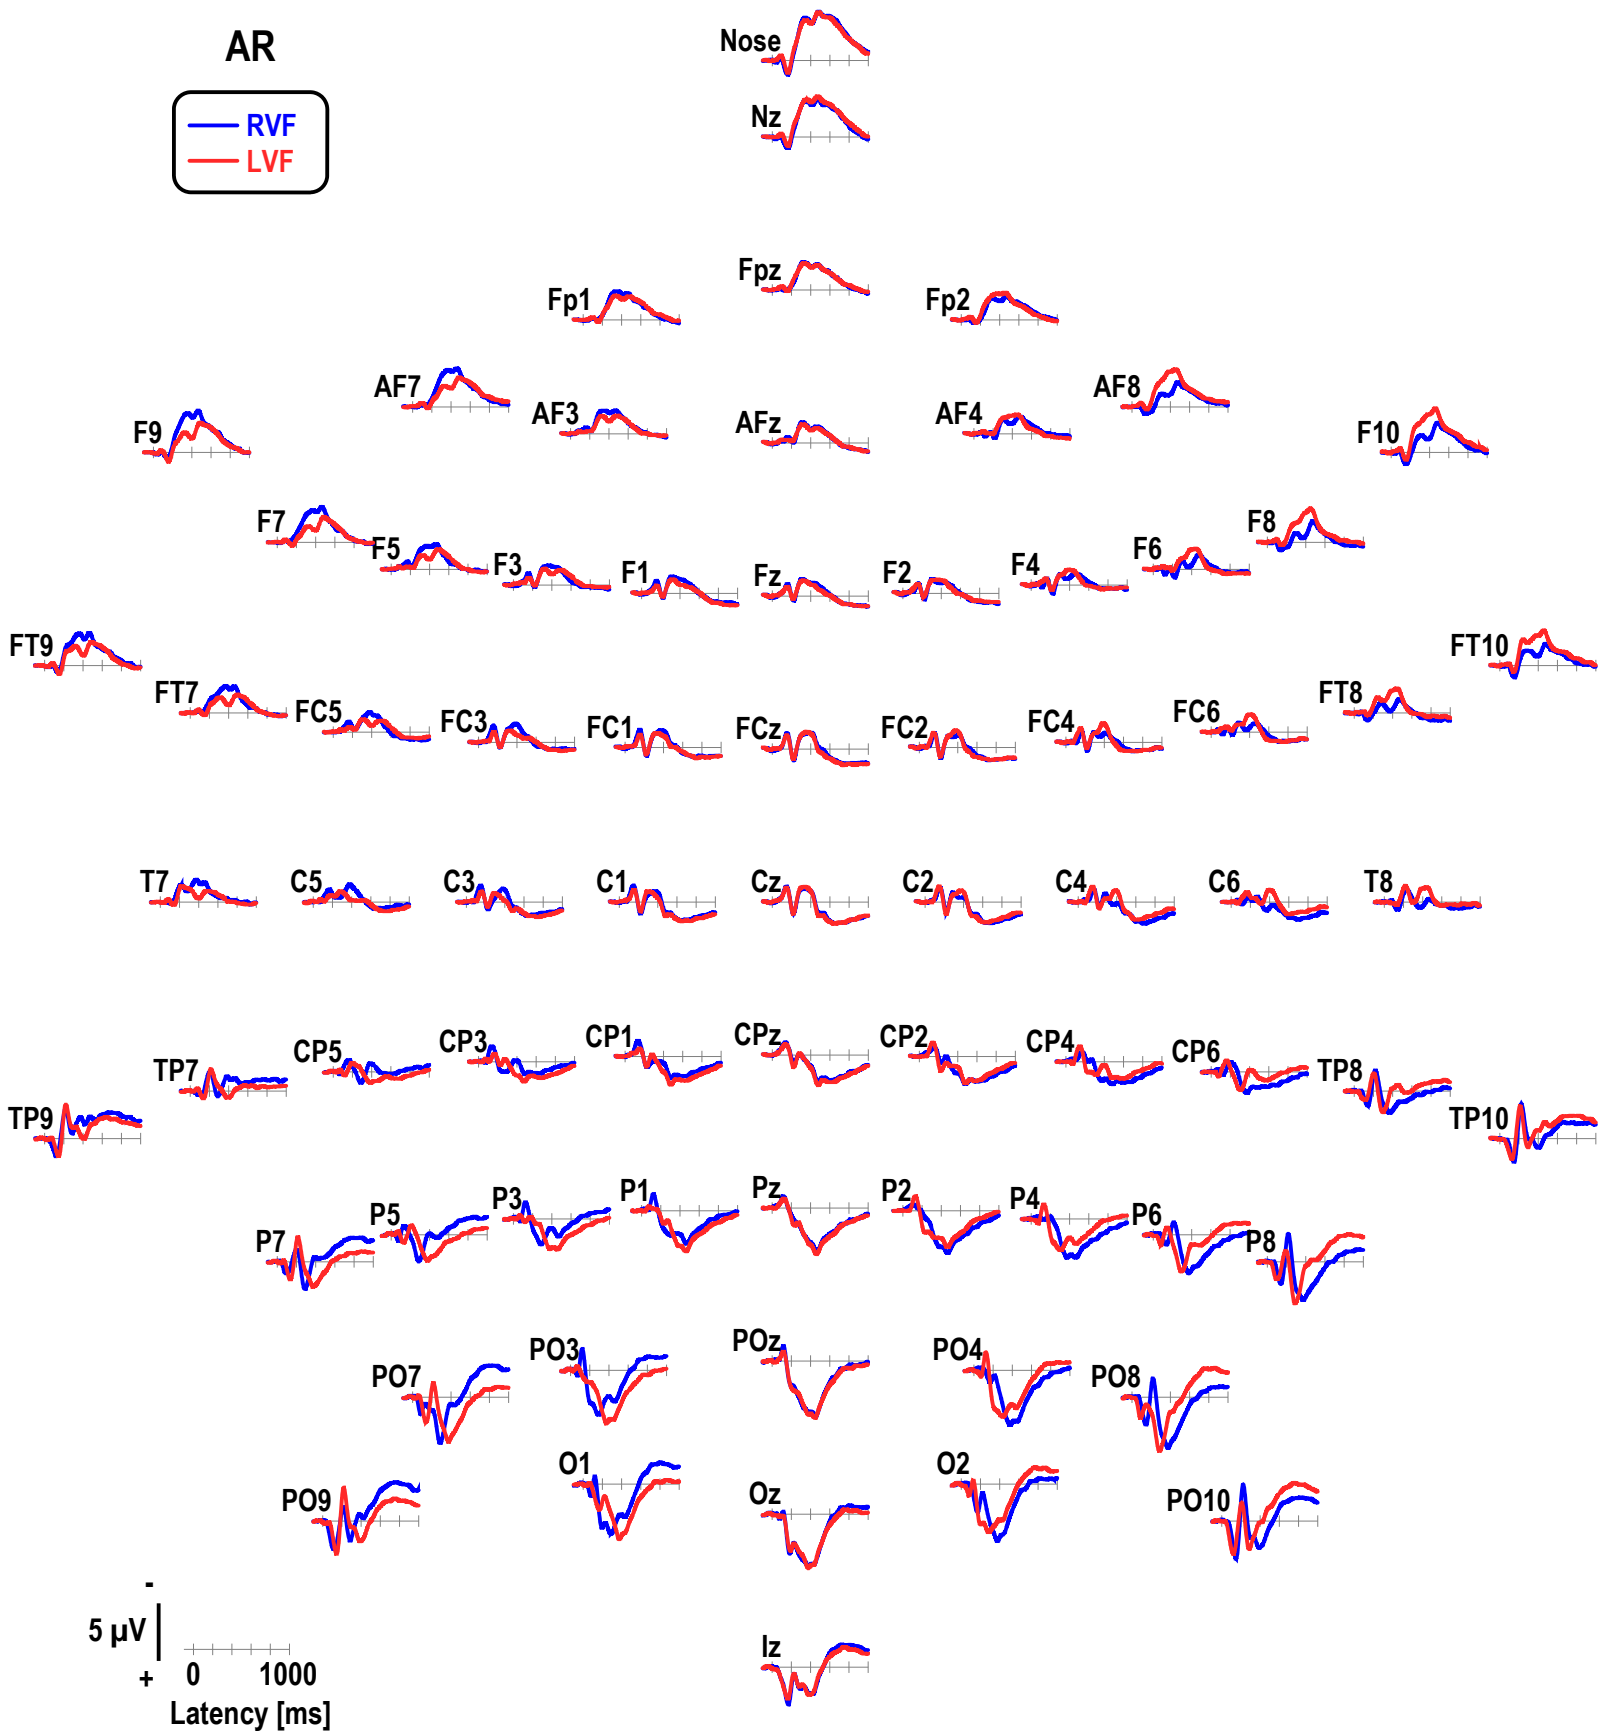

**Fig. S3.** ERPs shown in Fig. S1 referenced to all 72 recording sites (AR; average reference).

Supplement: NIHMS656493-supplement-b.pdf [file NIHMS656493-supplement-b.pdf]

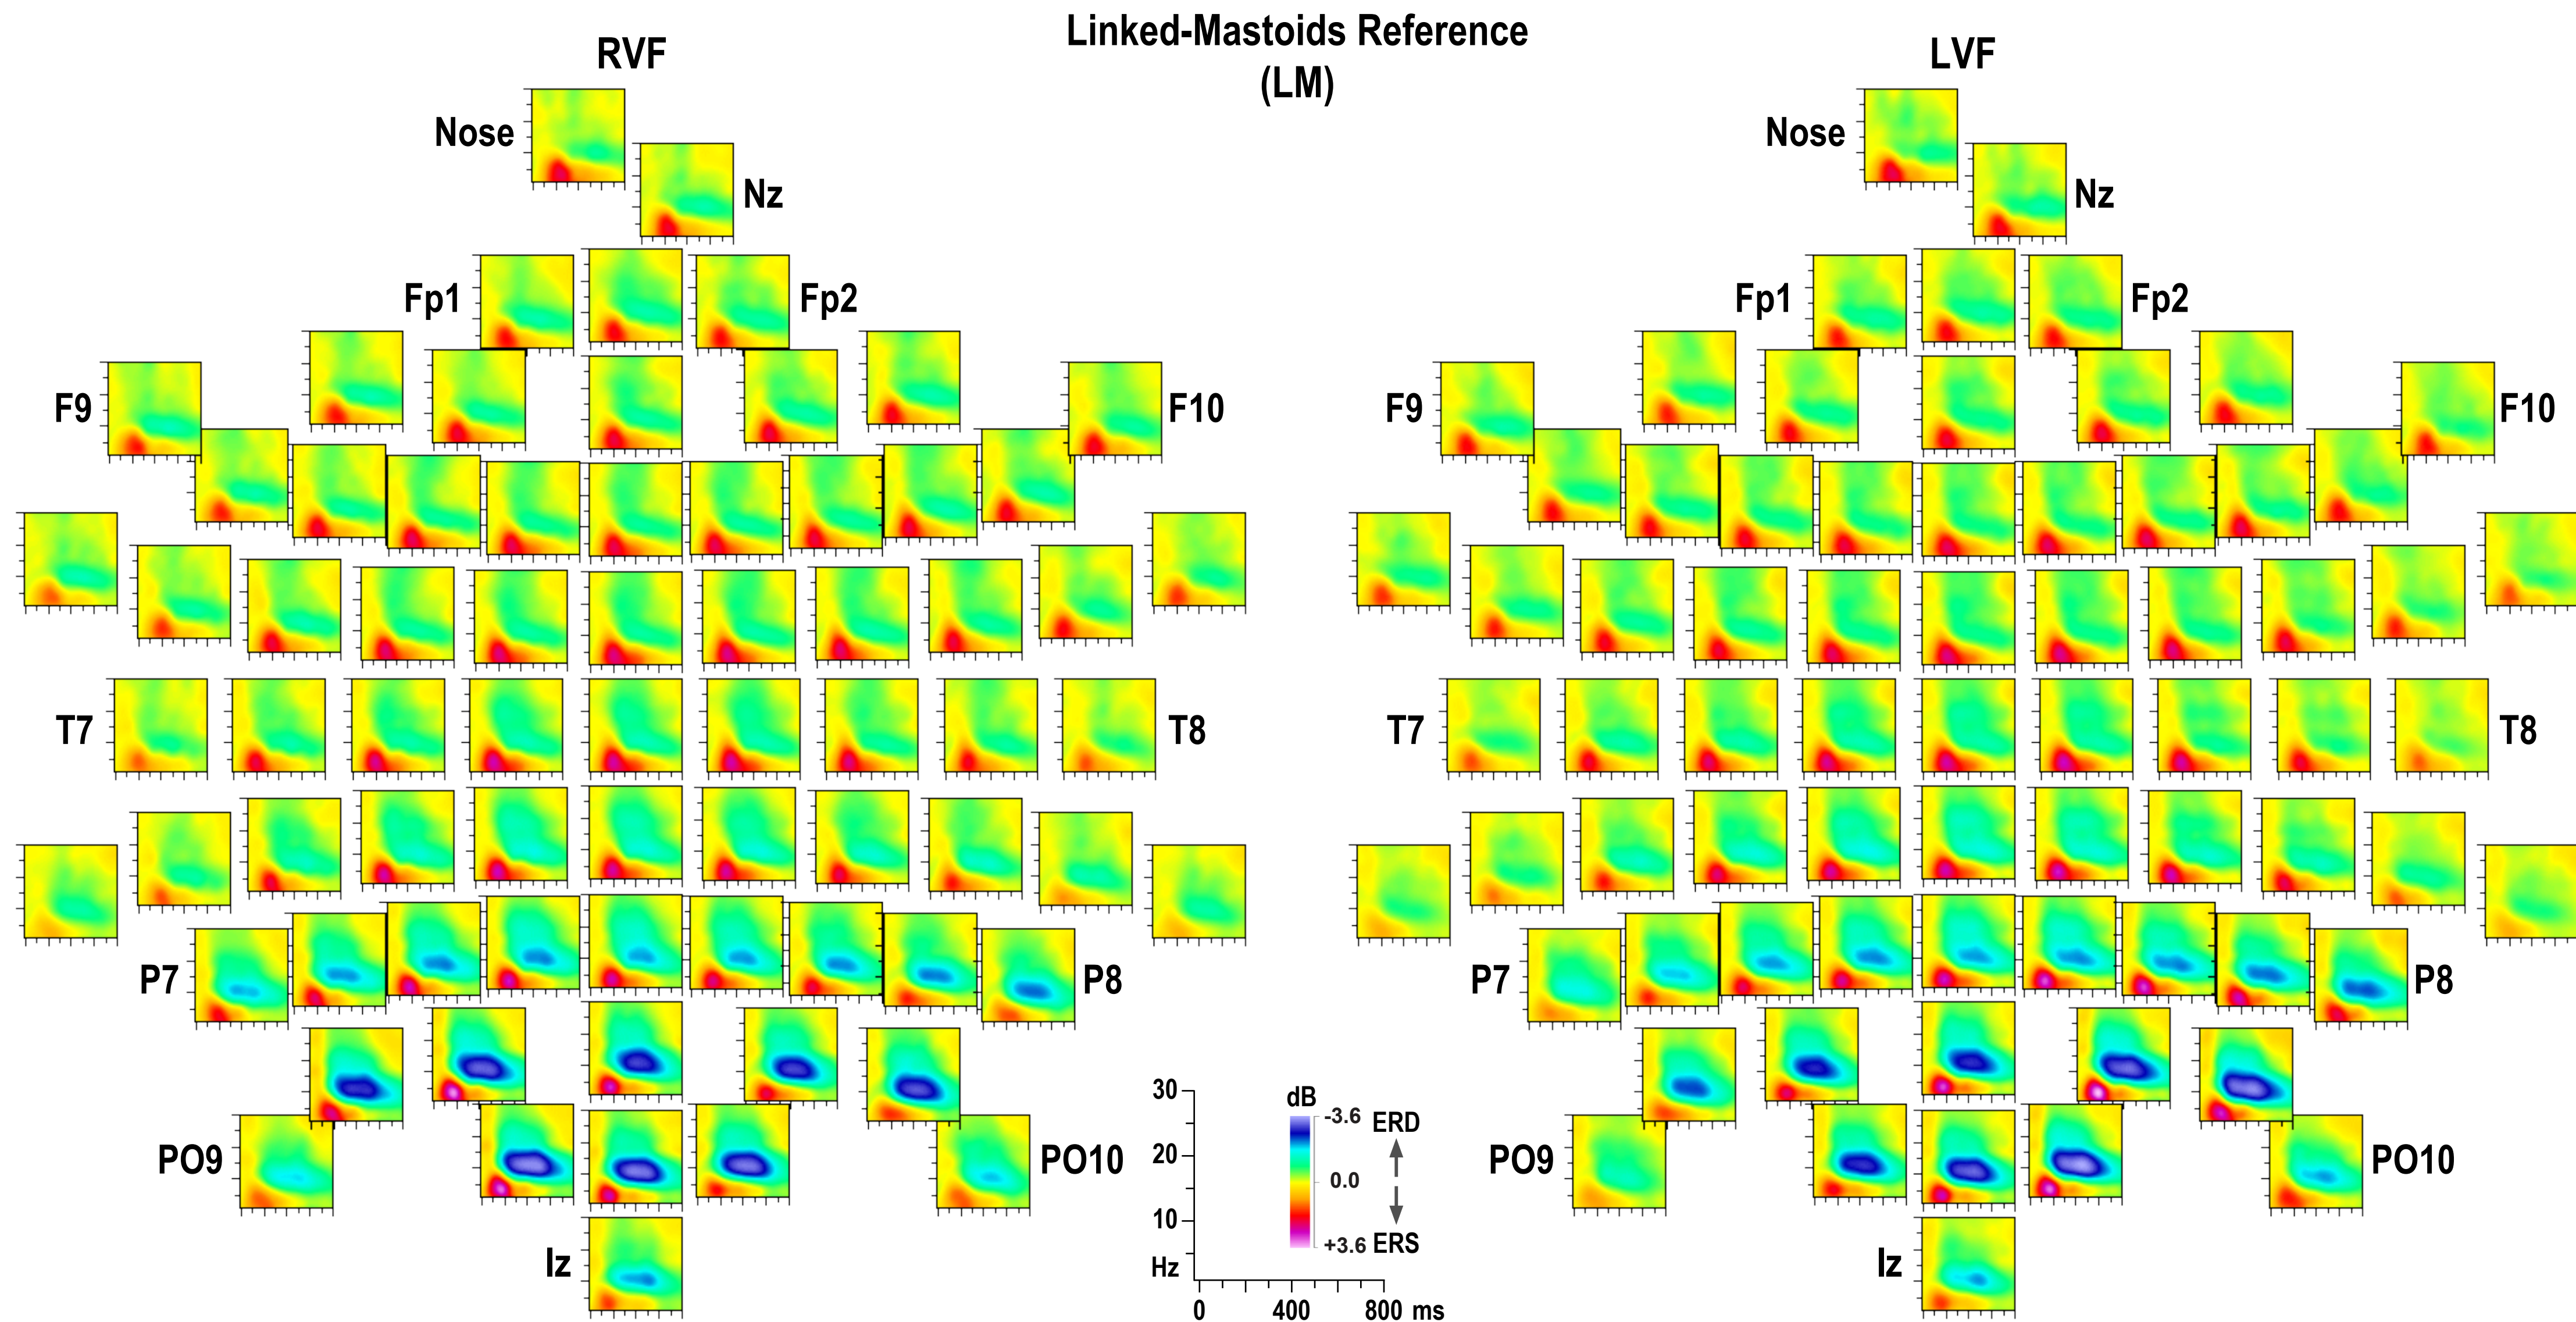

**Fig. S7.** ERSPs as shown in Fig. S6 using EEG referenced to linked mastoids (LM; sites TP9 and TP10).

Supplement: NIHMS656493-supplement-f.pdf [file NIHMS656493-supplement-f.pdf]
